## High performance single-cell gene regulatory network inference at scale: The Inferelator 3.0

Claudia Skok Gibbs<sup>a,1</sup>, Christopher A Jackson<sup>b,c,1</sup>, Giuseppe-Antonio Saldi<sup>b,c,1</sup>, Andreas Tjärnberg<sup>b,c</sup>, Aashna Shah<sup>a</sup>, Aaron Watters<sup>a</sup>, Nicholas De Veaux<sup>a</sup>, Konstantine Tchourine<sup>d</sup>, Ren Yi<sup>e</sup>, Tymor Hamamsy<sup>f</sup>, Dayanne M Castro<sup>b,c</sup>, Nicholas Carriero<sup>g</sup>, David Gresham<sup>b,c</sup>, Emily R Miraldi<sup>h,i</sup>, Richard Bonneau<sup>a,b,c,e,f</sup>

<sup>a</sup>*Flatiron Institute, Center for Computational Biology, Simons Foundation, New York, NY, USA*

<sup>b</sup>*Center For Genomics and Systems Biology, NYU, New York, NY, USA*

<sup>c</sup>*Department of Biology, NYU, New York, NY, USA*

<sup>d</sup>*Department of Systems Biology, Columbia University, New York, NY, USA*

<sup>e</sup>*Courant Institute of Mathematical Sciences, Computer Science Department, NYU, New York, NY, USA*

<sup>f</sup>*Center For Data Science, NYU, New York, NY, USA*

<sup>g</sup>*Flatiron Institute, Scientific Computing Core, Simons Foundation, New York, NY, USA*

<sup>h</sup>*Divisions of Immunobiology and Biomedical Informatics, Cincinnati Children's Hospital Medical Center, Cincinnati, OH, USA*

<sup>i</sup>*Department of Pediatrics, University of Cincinnati College of Medicine, Cincinnati, OH, USA*

---

### Abstract

**Motivation:** Gene regulatory networks define regulatory relationships between transcription factors and target genes within a biological system, and reconstructing them is essential for understanding cellular growth and function. Methods for inferring and reconstructing networks from genomics data have evolved rapidly over the last decade in response to advances in sequencing technology and machine learning. The scale of data collection has increased dramatically; the largest genome-wide gene expression datasets have grown from thousands of measurements to millions of single cells, and new technologies are on the horizon to increase to tens of millions of cells and above.

**Results:** In this work, we present the Inferelator 3.0, which has been

---

*Email address:* [rb133@nyu.edu](mailto:rb133@nyu.edu) (Richard Bonneau)

<sup>1</sup>These authors contributed equally, are listed alphabetically by last name, and may be re-ordered when citing this work

significantly updated to integrate data from distinct cell types to learn context-specific regulatory networks and aggregate them into a shared regulatory network, while retaining the functionality of the previous versions. The Inferelator is able to integrate the largest single-cell datasets and learn cell-type specific gene regulatory networks. Compared to other network inference methods, the Inferelator learns new and informative *Saccharomyces cerevisiae* networks from single-cell gene expression data, measured by recovery of a known gold standard. We demonstrate its scaling capabilities by learning networks for multiple distinct neuronal and glial cell types in the developing *Mus musculus* brain at E18 from a large (1.3 million) single-cell gene expression dataset with paired single-cell chromatin accessibility data.

**Availability:** The inferelator software is available on GitHub (<https://github.com/flatironinstitute/inferelator>) under the MIT license and has been released as python packages with associated documentation (<https://inferelator.readthedocs.io/>).

---

## 1. Background

Gene expression is tightly regulated at multiple levels in order to control cell growth, development, and response to environmental conditions (Figure 1A). Transcriptional regulation is principally controlled by Transcription Factors (TFs) that bind to DNA and effect chromatin remodeling (Zaret, 2020) or directly modulate the output of RNA polymerases (Kadonaga, 2004). Three percent of *Saccharomyces cerevisiae* genes are TFs (Hahn and Young, 2011), and more than six percent of human genes are believed to be TFs or cofactors (Lambert *et al.*, 2018). Connections between TFs and genes combine to form a transcriptional Gene Regulatory Network (GRN) that can be represented as a directed graph (Figure 1B). Learning the true regulatory network that connects regulatory TFs to target genes is a key problem in biology (Thompson *et al.*, 2015; Chasman *et al.*, 2016). Determining the valid GRN is necessary to explain how mutations that cause gene dysregulation lead to complex disease states (Hu *et al.*, 2016), how variation at the genetic level leads to phenotypic variation (Mehta *et al.*, 2021; Peter and Davidson, 2011), and how to re-engineer organisms to efficiently produce industrial chemicals and enzymes (Huang *et al.*, 2017).

Learning genome-scale networks relies on genome-wide expression measurements, initially captured with microarray technology (DeRisi *et al.*, 1997), but today typically measured by RNA-sequencing (RNA-seq) (Nagalakshmi *et al.*, 2008). A major difficulty is that biological systems have

23 large numbers of both regulators and targets, and many regulators are re-  
24 dundant or interdependent. Many plausible networks can explain observed  
25 expression data and the regulation of gene expression (Szederkényi *et al.*,  
26 2011), which makes identifying the correct network challenging. Designing  
27 experiments to produce data that increases network identifiability is possi-  
28 ble (Ud-Dean and Gunawan, 2016), but most data is collected for specific  
29 projects and repurposed for network inference as a consequence of the cost  
30 of data collection. Large-scale experiments in which a perturbation is made  
31 and dynamic data is collected over time is exceptionally useful for learning  
32 GRNs but systematic studies that collect this data are rare (Hackett *et al.*,  
33 2020).

34 Measuring the expression of single cells using single-cell RNA-sequencing  
35 (scRNAseq) is an emerging and highly scalable technology. Microfluidic-  
36 based single-cell techniques (Macosko *et al.*, 2015; Zilionis *et al.*, 2017; Zheng  
37 *et al.*, 2017) allow for thousands of measurements in a single experiment.  
38 Split-pool barcoding techniques (Rosenberg *et al.*, 2018) are poised to in-  
39 crease single-cell throughput by an order of magnitude. These techniques  
40 have been successfully applied to generate multiplexed gene expression data  
41 from pools of barcoded cell lines with loss-of-function TF mutants (Dixit  
42 *et al.*, 2016; Jackson *et al.*, 2020), enhancer perturbations (Schraivogel *et al.*,  
43 2020), and disease-causing oncogene variants (Ursu *et al.*, 2020). Individual  
44 cell measurements are sparser and noisier than measurements generated us-  
45 ing traditional RNA-seq, although in aggregate the gene expression profiles  
46 of single-cell data match RNA-seq data well (Svensson, 2020), and tech-  
47 niques to denoise single-cell data have been developed (Arisdakessian *et al.*,  
48 2019; Tjärnberg *et al.*, 2021).

49 The *seurat* (Stuart *et al.*, 2019) and *scanpy* (Wolf *et al.*, 2018) bioin-  
50 formatics toolkits are established tools for single-cell data analysis, but  
51 pipelines for inferring GRNs from single-cell data are still nascent, although  
52 many are under development (Zappia and Theis, 2021). Recent work has be-  
53 gun to systematically benchmarking network inference tools, and the BEE-  
54 LINE (Pratapa *et al.*, 2020) and other (Nguyen *et al.*, 2021; Chen and Mar,  
55 2018) benchmarks have identified promising methods. Testing on real-world  
56 data has proved difficult, as reliable gold standard networks for higher eu-  
57 karyotes do not exist. scRNAseq data for microbes which have some known  
58 ground truth networks (like *Saccharomyces cerevisiae* and *Bacillus subtilis*)  
59 was not collected until recently. As a consequence, most computational  
60 method benchmarking has been done using simulated data. Finally, GRN  
61 inference is computationally challenging, and the most scalable currently-  
62 published GRN pipeline has learned GRNs from 50,000 cells of gene expres-

63 sion data (Van de Sande *et al.*, 2020).

64 Here we describe the Inferelator 3.0 pipeline for single-cell GRN infer-  
65 ence, based on regularized regression (Bonneau *et al.*, 2006). This pipeline  
66 calculates TF activity (Ma and Brent, 2021) using a prior knowledge net-  
67 work and regresses scRNAseq expression data against that activity estimate  
68 to learn new regulatory edges. We compare it directly to two other network  
69 inference methods that also utilize prior network information and scRNAseq  
70 data, benchmarking using real-world *Saccharomyces cerevisiae* scRNAseq  
71 data and comparing to a high-quality gold standard network. The first  
72 comparable method, SCENIC (Van de Sande *et al.*, 2020), is GRN inference  
73 pipeline that estimates the importance of TFs in explaining gene expres-  
74 sion profiles and then constrains this correlative measure with prior network  
75 information to identify regulons. The second comparable method, CellOr-  
76 acle (Kamimoto *et al.*, 2020), has been recently proposed as a pipeline to  
77 integrate single-cell ATAC and expression data using a motif-based search  
78 for potential regulators, followed by bagging Bayesian ridge regression to  
79 enforce sparsity in the output GRN.

80 Older versions of the Inferelator (Madar *et al.*, 2009) have performed well  
81 inferring networks for *Bacillus subtilis* (Arrieta-Ortiz *et al.*, 2015), human  
82 Th17 cells (Ciofani *et al.*, 2012; Miraldi *et al.*, 2019), mouse lymphocytes  
83 (Pokrovskii *et al.*, 2019), *Saccharomyces cerevisiae* (Tchourine *et al.*, 2018),  
84 and *Oryza sativa* (Wilkins *et al.*, 2016). We have implemented the Infe-  
85 relator 3.0 with new functionality in python to learn GRNs from scRNAseq  
86 data. Three different model selection methods have been implemented: a  
87 Bayesian best-subset regression method (Greenfield *et al.*, 2013), a StARS-  
88 LASSO (Miraldi *et al.*, 2019) regression method in which the regularization  
89 parameter is set by stability selection (Liu *et al.*, 2010), and a multitask-  
90 learning regression method (Castro *et al.*, 2019). This new package provides  
91 scalability, allowing millions of cells to be analyzed together, as well as in-  
92 tegrated support for multi-task GRN inference, while retaining the ability  
93 to utilize bulk gene expression data. We show that the Inferelator 3.0 is a  
94 state-of-the-art method by testing against SCENIC and CellOracle on model  
95 organisms with reliable ground truth networks, and show that the Inferelator  
96 3.0 can generate a mouse neuronal GRN from a publicly available dataset  
97 containing 1.3 million cells.

## 98 2. Results

### 99 2.1. The Inferelator 3.0

100 In the 12 years since the last major release of the Inferelator (Madar  
101 *et al.*, 2009), the scale of data collection in biology has accelerated enor-  
102 mously. We have therefore rewritten the Inferelator as a python package to  
103 take advantage of the concurrent advances in data processing. For inference  
104 from small scale gene expression datasets ( $< 10^4$  observations), the Inferela-  
105 tor 3.0 uses native python multiprocessing to run on individual computers.  
106 For inference from extremely large scale gene expression datasets ( $> 10^4$  ob-  
107 servations) that are increasingly available from scRNAseq experiments, the  
108 Inferelator 3.0 takes advantage of the Dask analytic engine (Rocklin, 2015)  
109 for deployment to high-performance clusters (Figure 1C), or for deployment  
110 as a kubernetes image to the Google cloud computing infrastructure.

### 111 2.2. Network Inference using Bulk RNA-Seq Expression Data

112 We incorporated several network inference model selection methods into  
113 the Inferelator 3.0 (Figure 2A) and evaluate their performance on the prokary-  
114 otic model *Bacillus subtilis* and the eukaryotic model *Saccharomyces cere-*  
115 *visiae*. Both *B. subtilis* (Arrieta-Ortiz *et al.*, 2015; Nicolas *et al.*, 2012)  
116 and *S. cerevisiae* (Tchourine *et al.*, 2018; Hackett *et al.*, 2020) have large  
117 bulk RNA-seq and microarray gene expression datasets, in addition to a  
118 relatively large number of experimentally determined TF-target gene inter-  
119 actions that can be used as a gold standard for assessing network infer-  
120 ence. Using two independent datasets for each organism, we find that the  
121 model selection methods Bayesian Best Subset Regression (BBSR) (Green-  
122 field *et al.*, 2010) and Stability Approach to Regularization Selection for  
123 Least Absolute Shrinkage and Selection Operator (StARS-LASSO) (Miraldi  
124 *et al.*, 2019) perform equivalently (Figure 2B).

125 The two independent data sets show clear batch effects (Supplemental  
126 Figure 1A), and combining them for network inference is difficult; concep-  
127 tually, each dataset is in a separate space, and must be mapped into a  
128 shared space. We take a different approach to addressing the batch effects  
129 between datasets by treating them as separate learning tasks (Castro *et al.*,  
130 2019) and then combining network information into a unified GRN. This re-  
131 sults in a considerable improvement in network inference performance over  
132 either dataset individually (Figure 2C). The best performance is obtained  
133 with Adaptive Multiple Sparse Regression (AMuSR) (Castro *et al.*, 2019),  
134 a multi-task learning method that shares information between tasks during  
135 regression. The GRN learned with AMuSR explains the variance in the

136 expression data better than learning networks from each dataset individu-  
137 ally with BBSR or StARS-LASSO and then combining them (Supplemental  
138 Figure 1B), and retains a common network core across different tasks (Sup-  
139 plemental Figure 1C).

### 140 *2.3. Generating Prior Networks from Chromatin Data and Transcription* 141 *Factor Motifs*

142 The Inferelator 3.0 produces an inferred network from a combination of  
143 gene expression data and a prior knowledge GRN constructed from existing  
144 knowledge about known gene regulation. Curated databases of regulator-  
145 gene interactions culled from domain-specific literature are an excellent  
146 source for prior networks. While some model systems have excellent databases  
147 of known interactions, these resources are unavailable for most organisms or  
148 cell types. In these cases, using chromatin accessibility determined by a  
149 standard Assay for Transposase-Accessible Chromatin (ATAC) in combina-  
150 tion with the known DNA-binding preferences for TFs to identify putative  
151 target genes is a viable alternative (Miraldi *et al.*, 2019).

152 To generate these prior networks we have developed the inferelator-prior  
153 accessory package that uses TF motif position-weight matrices to score TF  
154 binding within gene regulatory regions and build sparse prior networks (Fig-  
155 ure 3A). These gene regulatory regions can be identified by ATAC, by ex-  
156 isting knowledge from TF Chromatin Immunoprecipitation (ChIP) experi-  
157 ments, or from known databases (e.g. ENCODE (ENCODE Project Con-  
158 sortium *et al.*, 2020)). Here, we compare the inferelator-prior tool to the  
159 CellOracle package (Kamimoto *et al.*, 2020) that also constructs motif-based  
160 networks that can be constrained to regulatory regions, in *Saccharomyces*  
161 *cerevisiae* by using sequences 200bp upstream and 50bp downstream of each  
162 gene TSS as the gene regulatory region. The inferelator-prior and CellOracle  
163 methods produce networks that are similar when measured by Jaccard index  
164 but are dissimilar to the YEASTRACT literature-derived network (Figure  
165 3B). These motif-derived prior networks from both the inferelator-prior and  
166 CellOracle methods perform well as prior knowledge for GRN inference us-  
167 ing the Inferelator 3.0 pipeline (Figure 3C). The source of the motif library  
168 has a significant effect on network output, as can be seen with the well-  
169 characterized TF GAL4. GAL4 has a canonical  $CGGN_{11}CGG$  binding site;  
170 different motif libraries have different annotated binding sites (Supplemental  
171 Figure 2A) and yield different motif-derived networks with the inferelator-  
172 prior pipeline (Supplemental Figure 2B-C).

#### 173 2.4. Network Inference using Single-Cell Expression Data

174 Single-cell data is undersampled and noisy, but large numbers of obser-  
175 vations are collected in parallel. As network inference is a population-level  
176 analysis which must already be robust against noise, we reason that data  
177 preprocessing that improves per-cell analyses (like imputation) is unneces-  
178 sary. We test this by quantitatively evaluating networks learned from *Sac-*  
179 *charomyces cerevisiae* scRNAseq data (Jackson *et al.*, 2020; Jariani *et al.*,  
180 2020) with a previously-defined yeast gold standard (Tchourine *et al.*, 2018).  
181 This expression data is split into 15 separate tasks, based on labels that cor-  
182 respond to experimental conditions from the original works (Figure 4A).  
183 A network is learned for each task separately using the YEASTRACT  
184 literature-derived prior network, from which a subset of genes are with-  
185 held, and aggregated into a final network for scoring on held-out genes from  
186 the gold standard. We test a combination of several preprocessing options  
187 with three network inference model selection methods (Figure 4B-D).

188 We find that network inference is generally sensitive to the preprocessing  
189 options chosen, and that this effect outweighs the differences between differ-  
190 ent model selection methods (Figure 4B-D). A standard Freeman-Tukey or  
191  $\log_2$  pseudocount transformation on raw count data yields the best perfor-  
192 mance, with notable decreases in recovery of the gold standard when count  
193 data is count depth-normalized (such that each cell has the same total tran-  
194 script counts). The performance of the randomly generated Noise control  
195 (N) is higher than the performance of the shuffled (S) control when counts  
196 per cell are not normalized, suggesting that total counts per cell provides  
197 additional information during inference.

198 Different model performance metrics, like AUPR, Matthews Correlation  
199 Coefficient (MCC), and F1 score correlate very well and identify the same  
200 optimal hyperparameters (Supplemental Figure 4). We apply AMuSR to  
201 data that has been Freeman-Tukey transformed to generate a final network  
202 without holding out genes for cross-validation (Figure 4E). While we use  
203 AUPR as a metric for evaluating model performance, selecting a threshold  
204 for including edges in a GRN by precision or recall requires a target precision  
205 or recall to be chosen arbitrarily. Choosing the Inferelator confidence score  
206 threshold to include the edges in a final network that maximize MCC is a  
207 simple heuristic to select the size of a learned network that maximizes overlap  
208 with another network (e.g. a prior knowledge GRN or gold standard GRN)  
209 while minimizing links not in that network (Figure 4F). Maximum F1 score  
210 gives a less conservative GRN as true negatives are not considered and will  
211 not diminish the score. Both metrics balance similarity to the test network

212 with overall network size, and therefore represent straightforward heuristics  
213 that do not rely on arbitrary thresholds.

214 In order to determine how the Inferelator 3.0 compares to similar network  
215 inference tools, we apply both CellOracle and SCENIC to the same network  
216 inference problem, where a set of genes are held out of the prior knowledge  
217 GRN and used for scoring. We see that the Inferelator 3.0 can make predic-  
218 tions on genes for which no prior information is known, but CellOracle and  
219 SCENIC cannot (Figure 4G). When provided with a complete prior knowl-  
220 edge GRN, testing on genes which are not held out, CellOracle outperforms  
221 the Inferelator, although the Inferelator is more robust to noise in the prior  
222 knowledge GRN (Figure 4H). This is a key advantage, as motif-generated  
223 prior knowledge GRNs are expected to be noisy.

### 224 *2.5. Large-scale Single-Cell Mouse Neuron Network Inference*

225 The Inferelator 3.0 is able to distribute work across multiple compu-  
226 tational nodes, allowing networks to be rapidly learned from  $> 10^5$  cells  
227 (Supplemental Figure 5A). We show this by applying the Inferelator to  
228 a large (1.3 million cells of scRNAseq data), publicly available dataset of  
229 mouse brain cells (10x genomics) that is accompanied by 15,000 single-cell  
230 ATAC (scATAC) measurements. We separate the expression and scATAC  
231 data into broad categories; Excitatory neurons, Interneurons, Glial cells and  
232 Vascular cells (Figure 5A-E). After initial quality control, filtering, and cell  
233 type assignment, 766,402 scRNAseq and 7,751 scATAC observations remain  
234 (Figure 5F, Supplemental Figure 5B-D).

235 scRNAseq data is further clustered within broad categories into clusters  
236 (Figure 5B) that are assigned to specific cell types based on marker expres-  
237 sion (Figure 5C, Supplemental Figure 6). scATAC data is aggregated into  
238 chromatin accessibility profiles for Excitatory neurons, Interneurons, and  
239 Glial cells (Figure 5D) based on accessibility profiles (Figure 5E), which are  
240 then used with the TRANSFAC mouse motif position-weight matrices to  
241 construct prior knowledge GRNs with the inferelator-prior pipeline. Most  
242 scRNAseq cell type clusters have thousands of cells, however rare cell type  
243 clusters are smaller (Figure 5G)

244 After processing scRNAseq into 36 cell type clusters and scATAC data  
245 into 3 broad (Excitatory neurons, Interneurons, and Glial) prior GRNs, we  
246 used the Inferelator 3.0 to learn an aggregate mouse brain GRN. Each of  
247 the 36 clusters was assigned the most appropriate of the three prior GRNs  
248 and learned as a separate task using the AMuSR model selection framework.  
249 The resulting aggregate network contains 20,991 TF - gene regulatory edges,  
250 selected from the highest confidence predictions to maximize MCC (Figure



251 6A-B). A common regulatory core of 1,909 network edges is present in every  
252 task-specific network (Figure 6C). Task-specific networks from similar cell  
253 types tend to be highly similar, as measured by Jaccard index (Figure 6D).  
254 We learn very similar GRNs from each excitatory neuron task, and very  
255 similar GRNs from each interneuron task, although each of these broad cat-  
256 egories yields different regulatory networks. There are also notable examples  
257 where glial and vascular tasks produce GRNs that are distinctively different  
258 from other glial and vascular GRNs.

259 Finally, we can examine specific TFs and compare networks between  
260 cell type categories (Supplemental Figure 7). The TFs *Egr1* and *Atf4* are  
261 expressed in all cell types and *Egr1* is known to have an active role at  
262 embryonic day 18 (E18) (Sun *et al.*, 2019). In our learned network, *Egr1*  
263 targets 103 genes, of which 20 are other TFs (Figure 6E-G). Half of these  
264 targets (49) are common to both neurons and glial cells, while 38 target  
265 genes are specific to neuronal GRNs and 16 target genes are specific to glial  
266 GRNs. We identify 14 targets for *Atf4* (Figure 6H), the majority of which  
267 (8) are common to both neurons and glial cells, with only 1 target gene  
268 specific only to neuronal GRNs and 5 targets specific only to glial GRNs.

### 269 3. Discussion

270 We have developed the Inferelator 3.0 software package to scale to match  
271 the size of any network inference problem, with no organism-specific require-  
272 ments that preclude easy application to non-mammalian organisms. Model  
273 baselines can be easily established by shuffling labels or generating noised  
274 data sets, and cross-validation and scoring on holdout genes is built directly  
275 into the pipeline. We believe this is particularly important as evaluation of  
276 single-cell network inference tools on real-world problems has lagged behind  
277 the development of inference methods themselves. Single-cell data collection  
278 has focused on complex higher eukaryotes and left the single-cell network  
279 inference field bereft of reliable standards to test against. Recent collection  
280 of scRNAseq data from traditional model organisms provides an opportu-  
281 nity to identify successful and unsuccessful strategies for network inference.  
282 For example, we find that performance differences between our methods of  
283 model selection may be smaller than differences caused by data cleaning and  
284 preprocessing. Benchmarking using model organism data should be incor-  
285 porated in all single-cell method development, as it mitigates cherry-picking  
286 from complex network results and can prevent use of flawed performance  
287 metrics which are the only option when no reliable gold standard exists.

288 Unlike traditional RNA-seq that effectively measures the average gene  
289 expression of large number of cells, scRNAseq can yield individual measure-  
290 ments for many different cell types that are implementing distinct regula-  
291 tory programs. Learning GRNs from each of these cell types as a separate  
292 learning task in a multi-task framework allows cell type differences to be  
293 retained, while still taking advantage of the common regulatory programs.  
294 We demonstrate the use of this multi-task approach to simultaneously learn  
295 regulatory GRNs for a variety of mouse neuronal cell types from a very  
296 large ( $10^6$ ) single-cell data set. This includes learning GRNs for rare cell  
297 types; by sharing information between cell types during regression, we are  
298 able to learn a core regulatory network while also retaining cell type specific  
299 interactions. As the GRNs that have been learned for each cell type are  
300 sparse and consist of the highest-confidence regulatory edges, they are very  
301 amenable to exploration and experimental validation.

302 A number of limitations remain that impact our ability to accurately pre-  
303 dict gene expression and cell states. Most important is a disconnect between  
304 the linear modeling that we use to learn GRNs and the non-linear biophys-  
305 ical models that incorporate both transcription and RNA decay. Modeling  
306 strategies that more accurately reflect the underlying biology will improve  
307 GRN inference directly, and will also allow prediction of useful latent pa-  
308 rameters (e.g. RNA half-life) that are experimentally difficult to access. It  
309 is also difficult to determine if regulators are activating or repressing specific  
310 genes (Kamimoto *et al.*, 2020), complicated further by biological complexity  
311 that allows TFs to switch between activation and repression (Papatsenko  
312 and Levine, 2008). Improving prediction of the directionality of network  
313 edges, and if directionality is stable in different contexts would also be a  
314 major advance. Many TFs bind cooperatively as protein complexes, or an-  
315 tagonistically via competitive binding, and explicit modeling of these TF-TF  
316 interactions would also improve GRN inference and make novel biological  
317 predictions. The modular Inferelator 3.0 framework will allow us to further  
318 explore these open problems in regulatory network inference without having  
319 to repeatedly reinvent and reimplement existing work. We expect this to be  
320 a valuable tool to build biologically-relevant GRNs for experimental follow-  
321 up, as well as a baseline for further development of computational methods  
322 in the network inference field.

#### 323 4. Methods

324 Additional methods available in Supplemental Methods

#### 325 4.1. Network Inference in *Bacillus subtilis*

326 Microarray expression data for *Bacillus subtilis* was obtained from NCBI  
327 GEO; GSE67023 (Arrieta-Ortiz *et al.*, 2015) (n=268) and GSE27219 (Nico-  
328 las *et al.*, 2012) (n=266). GRNs were learned using each expression dataset  
329 separately in conjunction with a known prior network (Arrieta-Ortiz *et al.*,  
330 2015) (Supplemental Data 1). Performance was evaluated by AUPR on  
331 ten replicates by holding 20% of the genes in the known prior network out,  
332 learning the GRN, and then scoring based on the held-out genes. Baseline  
333 shuffled controls were performed by randomly shuffling the labels on the  
334 known prior network.

335 Multi-task network inference uses the same *B. subtilis* prior for both  
336 tasks, with 20% of genes held out for scoring. Individual task networks are  
337 learned and rank-combined into an aggregate network. Performance was  
338 evaluated by AUPR on the held-out genes.

#### 339 4.2. Network Inference in *Saccharomyces cerevisiae*

340 A large microarray dataset was obtained from NCBI GEO and normal-  
341 ized for a previous publication (Tchourine *et al.*, 2018) (n=2,577; 10.5281/zen-  
342 odo.3247754). In short, this data was preprocessed with limma (Ritchie  
343 *et al.*, 2015) and quantile normalized. A second microarray dataset con-  
344 sisting of a large dynamic perturbation screen (Hackett *et al.*, 2020) was  
345 obtained from NCBI GEO accession GSE142864 (n=1,693). This dataset  
346 is  $\log_2$  fold change of an experimental channel over a control channel which  
347 is the same for all observations. GRNs were learned using each expression  
348 dataset separately in conjunction with a known YEASTRACT prior network  
349 (Teixeira *et al.*, 2018; Monteiro *et al.*, 2020) (Supplemental Data 1). Per-  
350 formance was evaluated by AUPR on ten replicates by holding 20% of the  
351 genes in the known prior network out, learning the GRN, and then scoring  
352 based on the held-out genes in a separate gold standard (Tchourine *et al.*,  
353 2018). Baseline shuffled controls were performed by randomly shuffling the  
354 labels on the known prior network.

355 Multi-task network inference uses the same YEASTRACT prior for both  
356 tasks, with 20% of genes held out for scoring. Individual task networks  
357 are learned and rank-combined into an aggregate network, which is then  
358 evaluated by AUPR on the held-out genes in the separate gold standard.

#### 359 4.3. Single-Cell Network Inference in *Saccharomyces cerevisiae*

360 Single-cell expression data for *Saccharomyces cerevisiae* was obtained  
361 from NCBI GEO (GSE125162 (Jackson *et al.*, 2020) and GSE144820 (Jariani

362 *et al.*, 2020)). Individual cells (n=44,343) are organized into one of 14 groups  
363 based on experimental metadata and used as separate tasks in network infer-  
364 ence. Genes were filtered such that any gene with fewer than than 2217 total  
365 counts in all cells (1 count per 20 cells) was removed. Data was used as raw,  
366 unmodified counts, was Freeman-Tukey transformed ( $\sqrt{x + 1} + \sqrt{x - 1}$ ),  
367 or was  $\log_2$  pseudocount transformed ( $\log_2(x + 1)$ ). Data was either not  
368 normalized, or depth normalized by scaling so that the sum of all counts  
369 for each cell is equal to the median of the sum of counts of all cells. For  
370 each set of parameters, network inference is run 10 times, using the YEAS-  
371 TRACT network as prior knowledge with 20% of genes held out for scoring.  
372 For noise-only controls, gene expression counts are simulated randomly such  
373 that for each gene  $i$ ,  $x_i \sim N(\mu_{x_i}, \sigma_{x_i})$  and the sum for each cell is equal to  
374 the sum in the observed data. For shuffled controls, the gene labels on the  
375 prior knowledge network are randomly shuffled.

#### 376 4.4. Single-Cell Network Inference in *Mus musculus* neurons

377 GRNs were learned using AMuSR on  $\log_2$  pseudocount transformed  
378 count data for each of 36 cell type specific clusters as separate tasks with the  
379 appropriate prior knowledge network. An aggregate network was created by  
380 rank-summing each cell type GRN. MCC was calculated for this aggregate  
381 network based on a comparison to the union of the three prior knowledge  
382 networks, and the confidence score which maximized MCC was selected as  
383 a threshold to determine the size of the final network. Neuron specific edges  
384 were identified by aggregating filtered individual task networks with their  
385 respective confidence score to maximize MCC. Each edge that was shared  
386 with a glial or vascular network was excluded. The remaining neuron specific  
387 edges are interneuron specific, excitatory specific or shared.

## 388 5. Supplemental Methods

### 389 5.1. BEELINE Benchmarks

390 Test data and networks for the BEELINE panel were obtained from  
391 Zenodo (DOI: 10.5281/zenodo.3378975). For tests without any prior net-  
392 work information, the Inferelator was provided with expression data and  
393 scored against the entire gold-standard network. For tests with prior in-  
394 formation, the Inferelator was provided with expression data and half the  
395 genes from the gold-standard network as a prior knowledge network. Scor-  
396 ing was performed on genes which were not provided in the prior knowledge  
397 network. Network inference was performed on each of expression data sets  
398 10 times, with different random seeds each time. The median AUPR of the  
399 10 network inference runs is reported as the performance for that specific  
400 expression data set. AUPR ratios are calculated using the baseline AUPR  
401 as defined in the BEELINE benchmarks. Scores for other methods are taken  
402 from supplemental data of the previously published BEELINE benchmark.

### 403 5.2. Benchmarking CellOracle & Scenic

404 CellOracle (v 0.7.5) was obtained from GitHub ([https://github.com/](https://github.com/morris-lab/CellOracle)  
405 `morris-lab/CellOracle` commit: `cda023a`) and installed into a new Ana-  
406 conda environment. pySCENIC (v0.11.2) was obtained from the python  
407 package manager pypi and installed into a new Anaconda environment. A  
408 benchmarking module was written for the Inferelator to run CellOracle  
409 and pySCENIC from the inferelator workflow. Data loading, crossvali-  
410 dation, simulation, and scoring functions are identical between all meth-  
411 ods. CellOracle was provided the prior knowledge network as a binary  
412 dataframe. pySCENIC was provided the prior knowledge network as a  
413 ranked-interaction feather database and TF lookup table, in accordance  
414 with the pySCENIC pipeline for generating prior knowledge databases for  
415 new organisms. Expression data for pySCENIC was log pseudocount trans-  
416 formed and scaled. Expression data for CellOracle was provided as raw  
417 counts, which was then log pseudocount transformed and scaled during Cel-  
418 lOracle run.

### 419 5.3. Inferelator 3.0 Single-Cell Computational Speed Profiling

420 144,682 mouse cells from the mouse neuronal subcluster EXC\_IT\_1 were  
421 used with the mouse excitatory neuron prior knowledge network to deter-  
422 mine Inferelator 3.0 runtime. To benchmark the python-based multiprocess-  
423 ing engine, the Inferelator was deployed to a single 28-core (Intel® Xeon®  
424 E5-2690) node. The Dask implementations of the Inferelator and pySCENIC

425 were deployed to 5 28-core (Intel® Xeon® E5-2690) nodes for a total of  
426 140 cpu cores. Either all 144,682 mouse cells were used, or a subset was  
427 randomly selected for each run, and used to learn a single GRN. Runtime  
428 was determined by the length of workflow execution, which includes loading  
429 data, running all regressions, and producing output files. We were unable  
430 to run the full 144k cell data set with pySCENIC due to runtime limitations  
431 (with GENIE3) or cryptic memory-related errors (with GRNBOOST2).

#### 432 5.4. Preprocessing *Mus musculus* single-cell data

433 Single-cell expression data from *Mus musculus* brain samples taken at  
434 E18 was obtained from 10x genomics (10x Genomics, 2017). SCANPY was  
435 used to preprocess and cluster the scRNAseq dataset. Genes present in fewer  
436 than 2% of cells were removed. Cells were filtered out when fewer than 1000  
437 genes were detected, the cell had more than 20,000 total gene counts, or the  
438 cell had more than 7% of gene counts assigned to mitochondrial transcripts.  
439 Transcript counts were then log transformed and normalized and scaled.  
440 Cells were assigned to mitotic or post mitotic phase based on cell cycle  
441 marker genes using `score_genes_cell_cycle` (Satija *et al.*, 2015). In order to  
442 focus on neuronal cells, all 374,369 mitotic cells were removed. Remaining  
443 cells were clustered by Leiden clustering (Resolution = 0.5) using the first  
444 300 principal components of the 2000 most highly variable genes. Broad cell  
445 types were assigned to each cluster based on the expression of marker genes  
446 Neurod6 for Excitatory neurons, Gad1 for Interneurons, and Apoe for glial  
447 cells. Cells from each broad cell type were then re-clustered into clusters  
448 based on the 2000 most highly variable genes within the cluster. Specific cell  
449 types were assigned to each subcluster based on the expression of marker  
450 genes (Di Bella *et al.*, 2020). Ambiguous clusters were discarded, removing  
451 151,765 cells, leaving resulting in 36 specific cell type clusters that consist  
452 of 766,402 total cells.

453 Single-cell ATAC data from *Mus musculus* brain samples taken at E18  
454 was obtained from 10x genomics; datasets are from samples prepared fresh  
455 (10x Genomics, 2019c), samples dissociated and cryopreserved (10x Ge-  
456 nomics, 2019a), and samples flash-frozen (10x Genomics, 2019b). ChromA  
457 (Gabbitto *et al.*, 2020) and SnapATAC (Fang *et al.*, 2021) were used to pro-  
458 cess the scATACseq datasets. Consensus peaks were called on the 3 datasets  
459 using ChromA. Each dataset was then run through the SnapATAC pipeline  
460 using the consensus peaks. Cells were clustered and labels from the scR-  
461 NAseq object were transferred to the scATAC data. Cells that did not  
462 have an assignment score  $\geq .5$  were discarded. Assigned barcodes were split

463 by cell class( EXC, IN or GL). ChromA was run again for each cell class  
464 generating 3 sets of cell class specific peaks.

465 Aggregated chromatin accessibility profiles were used with TRANSFAC  
466 v2020.1 motifs and the inferelator-prior (v0.3.0) pipeline to create prior  
467 knowledge connectivity matrices between TFs and target genes for exci-  
468 tatory neurons, interneurons, and glial cells. Vascular cells were not present  
469 in the scATAC data sufficiently to allow construction of a vascular cell prior  
470 with this method, and so vascular cells were assigned the glial prior for  
471 network inference.

#### 472 5.5. *Saccharomyces cerevisiae* prior knowledge networks

473 A prior knowledge matrix consists of a signed or unsigned connectiv-  
474 ity matrix between regulatory transcription factors (TFs) and target genes.  
475 This matrix can be obtained experimentally or by mining regulatory databases.  
476 For a TF - gene relationships to be directly causal, the TF must localize to  
477 the gene, and gene expression must change in response to perturbations in  
478 the TF. However, these criteria do not have to be met at all times. It is  
479 reasonable to expect that in many (or most) cell states, a TF may not lo-  
480 calize to a target gene, or expression of the gene may not be affected by  
481 perturbations in the TF.

482 Prior knowledge and gold standard networks are selected with these cri-  
483 teria in mind. The YEASTRACT prior knowledge network was obtained  
484 from the YEASTRACT database (Teixeira *et al.*, 2018; Monteiro *et al.*,  
485 2020) (<http://www.yeasttract.com/>; Downloaded 07/13/2019) which is  
486 constructed from published yeast TF localization and gene expression data.  
487 This prior knowledge network has 11,486 TF - gene edges from the YEAS-  
488 TRACT database for which evidence exists that the TF localizes to the  
489 target gene, and that the target gene expression changes upon TF pertur-  
490 bation. The yeast gold standard network was constructed in an earlier work  
491 (Tchourine *et al.*, 2018) and consists of 1,403 edges, which have multiple  
492 pieces of both DNA localization and target gene perturbation evidence.

#### 493 5.6. *TF Motif-Based Connectivity Matrix (inferelator-prior)*

494 Scanning genomic sequence near promoter regions for TF motifs allows  
495 for the construction of motif-derived priors which can be further constrained  
496 experimentally by incorporating information about chromatin accessibility  
497 (Miraldi *et al.*, 2019). We have further refined the generation of prior knowl-  
498 edge matrices with the python inferelator-prior package, which takes as in-  
499 put a gene annotation GTF file, a genomic FASTA file, and a TF motif file,  
500 and generates an unsigned connectivity matrix. It has dependencies on the

501 common scientific computing packages NumPy (Harris *et al.*, 2020), SciPy  
502 (Virtanen *et al.*, 2020), and scikit-learn (Pedregosa *et al.*, 2011). In addition,  
503 it uses the BEDTools kit (Quinlan and Hall, 2010) and associated python in-  
504 terface pybedtools (Dale *et al.*, 2011). The inferelator-prior package (v0.3.0  
505 was used to generate the networks in this manuscript) is available on github  
506 (<https://github.com/flaTironinstitute/inferelator-prior>) and can  
507 be installed through the python package manager pip.

### 508 5.6.1. Motif Databases

509 DNA binding motifs were obtained from published databases. CISBP  
510 (Lambert *et al.*, 2019) motifs were obtained from CIS-BP (<http://cisbp.cibr.utoronto.ca/>; Build 2.00; Downloaded 11/25/2020) and processed  
511 into a MEME-format file with the PWMtoMEME module of inferelator-  
512 prior. JASPAR (Fornes *et al.*, 2020) motifs were obtained as MEME files  
513 from JASPAR (<http://jaspar.genereg.net/>; 8th Release; Downloaded  
514 11/25/2020) . TRANSFAC (Matys *et al.*, 2006) motifs were licensed from  
515 geneXplain (<http://genexplain.com/transfac/>; Version 2020.1; Down-  
516 loaded 09/13/2020) and processed into a MEME-format file with the inferelator-  
517 prior motif parsing tools.

### 519 5.6.2. Motif Scanning

520 Genomic regions of interest are identified by locating annotated Tran-  
521 scription Start Sites (TSS) and opening a window that is appropriate for  
522 the organism. For microbial species with a compact genome (e.g. yeast),  
523 regions of interest are defined as 1000bp upstream and 100bp downstream  
524 of the TSS. For complex eukaryotes with large intergenic regions (e.g. mam-  
525 mals), regions of interest are defined as 50000bp upstream and 2500bp down-  
526 stream of the TSS. This is further constrained by intersecting the genomic  
527 regions of interest with a user-provided BED file, which can be derived from  
528 a chromatin accessibility experiment (ATAC-seq) or any other method of  
529 identifying chromatin of interest. Within these regions of interest, motif  
530 locations are identified using the Find Original Motif Occurrences (FIMO)  
531 (Grant *et al.*, 2011) tool from the MEME suite (Bailey *et al.*, 2009), called  
532 in parallel on motif chunks to speed up processing. Each motif hit identified  
533 by FIMO is then scored for information content (IC) (Kim *et al.*, 2003).  $IC_i$ ,  
534 ranging between 0 and 2 bits, is calculated for each base  $i$  in the binding  
535 site, where  $p_{b,i}$  is the probability of the base  $b$  at position  $i$  of the motif and  
536  $p_{b,bg}$  is the background probability of base  $b$  in the genome (Equation 1).  
537 Effective information content (EIC) (Equation 2) is the sum of all motif at



538 position  $i$  is  $IC_i$  penalized with the  $\ell_2$ -norm of the hit  $IC_i$  and the consensus  
539 motif base at position  $i$ ,  $IC_{i,\text{consensus}}$ .

$$IC_i = p_{b,i} \log_2 \left( \frac{p_{b,i}}{p_{b,bg}} \right) \quad (1)$$

$$EIC = \sum_i IC_i - |IC_i - IC_{i,\text{consensus}}|_2^2 \quad (2)$$

### 540 5.6.3. Connectivity Matrix

541 A TF-gene binding score is calculated separately for each TF and gene.  
542 Each motif hit for a TF within the region of interest around the gene is  
543 identified. Overlapping motif hits are resolved by taking the maximum IC  
544 for each overlapping base, penalized with the  $\ell_2$ -norm of differences from the  
545 motif consensus sequence. To account for cooperative TF binding effects,  
546 any motif hits within 100 bases (25 bases for yeast) are combined, and their  
547 EIC scores are summed. The TF-gene binding score is the maximum TF  
548 EIC after accounting for overlapping and adjacent TF motifs, and all TF-  
549 gene scores are assembled into a Genes x TFs score matrix.

550 This unfiltered TF-gene score matrix is not sparse as motifs for many  
551 TFs are expected to occur often by chance, and TF-gene scores for each TF  
552 are not comparable to scores for other TFs as motif position-weight matrices  
553 have differing information content. Scores for each TF are clustered using  
554 the density-based k-nearest neighbors algorithm DBSCAN (Ester *et al.*,  
555 1996) (MinPts = 0.001 \* number of genes, eps = 1). The cluster of TF-gene  
556 edges with the highest score values, and any high-score outliers, are retained  
557 in the connectivity matrix, and other TF-gene edges are discarded.

### 558 5.6.4. CellOracle Connectivity Matrix

559 CellOracle (Kamimoto *et al.*, 2020) was cloned from github (v0.6.5;  
560 <https://github.com/morris-lab/CellOracle>; a0da790). CellOracle was  
561 provided a BED file with promoter locations for each gene (200bp upstream  
562 of transcription start site to 50bp downstream of transcription start site) and  
563 the appropriate MEME file for each motif database. Connectivity matrices  
564 were predicted using a false positive rate of 0.02 and a motif score threshold  
565 of 6. The inferelator-prior pipeline was run using the same promoter  
566 locations and MEME files so that the resulting networks are directly comparable,  
567 and the Jaccard index between each network and the YEASTRACT  
568 network was calculated. Each motif-based network was used as a prior for  
569 inferelator network inference on *Saccharomyces cerevisiae*, with the same  
570 2577 genome-wide expression microarray measurements (Tchourine *et al.*,

571 2018). 20% of the genes were held out of the prior networks and used for  
572 scoring the resulting network inference. The motif-based network files have  
573 been included in Supplemental Data 1.

#### 574 *5.7. Network Inference (The Inferelator)*

575 The Inferelator modeling of gene regulatory networks relies on three main  
576 modeling assumptions. First, because many transcription factors (TFs) are  
577 post transcriptionally controlled and their expression level may not reflect  
578 their underlying biological activity, we assume that the activity of a TF can  
579 be estimated using expression levels of known targets from prior interactions  
580 data (Arrieta-Ortiz *et al.*, 2015; Fu *et al.*, 2011). Second, we assume that  
581 gene expression can be modeled as a weighted sum of the activities of TFs  
582 (Bonneau *et al.*, 2006; Castro *et al.*, 2019). Finally, we assume that each  
583 gene is regulated by a small subset of TFs and regularize the linear model  
584 to enforce sparsity.

585 The Inferelator was initially developed and distributed as an R package  
586 (Bonneau *et al.*, 2006; Greenfield *et al.*, 2010; Madar *et al.*, 2010; Greenfield  
587 *et al.*, 2013). We have rewritten it as a python package with dependen-  
588 cies on the common scientific computing packages NumPy (Harris *et al.*,  
589 2020), SciPy (Virtanen *et al.*, 2020), pandas (Wes McKinney, 2010), Ann-  
590 Data (Wolf *et al.*, 2018), and scikit-learn (Pedregosa *et al.*, 2011). Scaling is  
591 implemented either locally through python or as a distributed computation  
592 with the Dask (Rocklin, 2015) parallelization library. The inferelator pack-  
593 age (v0.5.6 was used to generate the networks in this manuscript) is avail-  
594 able on github (<https://github.com/flatironinstitute/inferelator>)  
595 and can be installed through the python package manager pip. The Infe-  
596 rator takes as input gene expression data and prior information on network  
597 structure, and outputs ranked regulatory hypotheses of the relative strength  
598 and direction of each interaction with an associated confidence score.

#### 599 *5.8. Transcription Factor Activity*

600 The expression level of a TF is often not suitable to describe its activity  
601 (Schacht *et al.*, 2014). Transcription factor activity (TFA) is an estimate of  
602 the latent activity of a TF that is inducing or repressing transcription of its  
603 targets in a sample. A gene expression dataset ( $\mathbf{X}$ ) is a Samples x Genes  
604 matrix where  $X_{i,j}$  is the observed mRNA expression level ( $i \in \text{Samples}$  and  
605  $j \in \text{Genes}$ ), measured either by microarray, RNA-seq, or single cell RNA  
606 sequencing (scRNA-seq).

$$X_{i,j} = \sum_k A_{i,k} P_{k,j} \quad (3)$$

607 We estimate TFA by solving (Equation 3) for activity ( $A_{i,k}$ ), where  $k \in$   
608 TFs, and  $\mathbf{P}$  is a TFs x Genes prior connectivity matrix.  $P_{k,j}$  is non-zero if  
609 gene  $j$  is regulated by TF  $k$  and 0 if it is not. In matrix notation,  $\mathbf{X} = \mathbf{A}\mathbf{P}$ ,  
610 and  $\hat{\mathbf{A}}$  is estimated by minimizing  $\|\hat{\mathbf{A}}\mathbf{P} - \mathbf{X}\|_2^2$ . This is calculated by the  
611 pseudoinverse  $\mathbf{P}^\dagger$  and solving  $\hat{\mathbf{A}} = \mathbf{X}\mathbf{P}^\dagger$ . The resulting  $\hat{\mathbf{A}}$  is a Samples x TF  
612 activities matrix where  $\hat{A}_{i,k}$  is the estimated latent TFA for sample  $i$  and  
613 TF  $k$ . In cases where all values in  $\mathbf{P}$  for a TF are 0, that TF is removed  
614 from  $\mathbf{P}$  and the expression  $\mathbf{X}$  of that TF is used in place of activity.

### 615 5.9. Inferelator Network Inference

616 Linear models (Equation 4) are separately constructed for each gene  $j$ .

$$X_i = \sum_k \hat{A}_{i,k} \beta_k \quad (4)$$

617 In addition to the model selection methods described here, we have imple-  
618 mented a module which takes any scikit-learn regression object (for example,  
619 elastic net (Zou and Hastie, 2005)). Model selection and regularization tech-  
620 niques are applied to enforce the biological property of sparsity. If the co-  
621 efficient  $\beta_{j,k}$  is non-zero, it is evidence for a regulatory relationship between  
622 TF  $k$  and gene  $j$ .

$$S_{j,k} = 1 - \frac{\sigma_{allTFs}^2}{\sigma_{TF_k,leaveout}^2} \quad (5)$$

623 For each gene  $j$ , the amount of variance explained by each regulatory TF  
624  $k$  is calculated as the ratio between the variance of the residuals in the full  
625 model and the variance of the residuals when the linear model is refit by  
626 ordinary least squares (OLS) and  $k$  is left out (Equation 5).

627 In order to mitigate the effect of outliers and sampling error, model se-  
628 lection is repeated multiple times using input expression data  $\mathbf{X}$  that has  
629 been bootstrapped (resampled with replacement). Predicted TF-gene inter-  
630 actions are ranked for each bootstrap by amount of variance explained and  
631 then rank-combined into a unified network prediction. Confidence scores are  
632 assigned based on the combined rank for each interaction, and the overall  
633 network is compared to a gold standard and performance is evaluated by  
634 area under the precision-recall curve.

635 The effects of setting hyperparameters can be tested by cross-validation  
 636 on the prior and gold standard networks. This strategy holds out a subset  
 637 of genes (rows) from the prior knowledge network  $\mathbf{P}$ . Network inference  
 638 performance is then evaluated on only those held-out genes, using the gold  
 639 standard network.

#### 640 5.9.1. Model Selection: Bayesian Best Subset Regression

641 Bayesian Best Subset Regression (BBSR) is a model selection method de-  
 642 scribed in detail in (Greenfield *et al.*, 2013). Initial feature selection for this  
 643 method is necessary as best subset regression on all possible combinations of  
 644 hundreds of TF features is computationally intractable. We therefore select  
 645 ten TF features with the highest context likelihood of relatedness between  
 646 expression of each gene and activity of each TF. This method is described  
 647 in detail in (Madar *et al.*, 2010).

648 First, gene expression and TF activity are discretized into equal-width  
 649 bins ( $n=10$ ) and mutual information is calculated based on their discrete  
 650 probability distributions (Equation 6) to create a mutual information matrix  
 651  $\mathbf{M}^{dyn}$ .

$$M_{j,k}^{dyn} = p(X_j, \hat{A}_k) \log \frac{p(X_j, \hat{A}_k)}{p(X_j)p(\hat{A}_k)} \quad (6)$$

$$M_{k_1,k_2}^{stat} = p(\hat{A}_{k_1}, \hat{A}_{k_2}) \log \frac{p(\hat{A}_{k_1}, \hat{A}_{k_2})}{p(\hat{A}_{k_1})p(\hat{A}_{k_2})} \quad (7)$$

652 Mutual information is also calculated between activity of each TF (Equation  
 653 7) to create a mutual information matrix  $\mathbf{M}^{stat}$ .

$$z_{j,k}^{dyn} = \frac{M_{j,k}^{dyn} - \sum_j \frac{M_{j,k}^{dyn}}{n_i}}{\sigma_k^{dyn}} \quad (8)$$

$$z_{j,k}^{stat} = \frac{M_{j,k}^{stat} - \sum_j \frac{M_{j,k}^{stat}}{n_i}}{\sigma_k^{stat}} \quad (9)$$

$$z_{j,k}^{mixed} = \sqrt{(z_{j,k}^{dyn})^2 + (z_{j,k}^{stat})^2} \quad (10)$$

654 A mixed context likelihood of relatedness score is then calculated as a  
 655 pseudo-zscore by calculating  $\mathbf{Z}^{dyn}$  (Equation 8) and  $\mathbf{Z}^{stat}$  (Equation 9). Any  
 656 values less than 0 in  $\mathbf{Z}^{dyn}$  or  $\mathbf{Z}^{stat}$  are set to 0, and then they are combined  
 657 into a mixed context likelihood of relatedness matrix  $\mathbf{Z}^{mixed}$  (Equation 10).

658 For each gene  $j$ , the 10 TFs with the highest mixed context likelihood of  
 659 relatedness values are selected for regression.

660 For best subset regression, a linear model is fit with OLS for every com-  
 661 bination of the selected predictor variables.

$$\rho(\beta, \sigma^2 | X_j) = \rho(\beta | X_j, \sigma^2) \rho(\sigma^2 | X_i) \quad (11)$$

$$\rho(\sigma^2 | X_i) \propto IG\left(\frac{n}{2}, \frac{SSR}{2} + \frac{(\beta_0 - \beta_{OLS}) \mathbf{G} \mathbf{X}' \mathbf{X} \mathbf{G} (\beta_0 - \beta_{OLS})}{2}\right) \quad (12)$$

662 We define  $\beta_0$  as our null prior for the model parameters (zeros),  $\beta_{OLS}$  as the  
 663 model coefficients from OLS,  $SSR$  as the sum of squared residuals, and  $\mathbf{G}$   
 664 as a  $g$ -prior diagonal matrix where the diagonal values represent a weight  
 665 for each predictor variable.  $g$ -prior weights in  $\mathbf{G}$  close to 0 favor  $\beta$  values  
 666 close to  $\beta_0$ . Large  $g$ -prior weights favor  $\beta$  values close to  $\beta_{OLS}$ . By default,  
 667 we select  $g$ -prior weights of 1 for all predictor variables. From the joint  
 668 posterior distribution (Equation 11) we can calculate the marginal posterior  
 669 distribution of  $\sigma^2$  (Equation 12), where IG is the inverse gamma distribution.  
 670 The Bayesian information criterion (BIC) is calculated for each model, where  
 671  $n$  is the number of observations and  $k$  is the number of predictors (Equation  
 672 13).

$$BIC = n \ln(\sigma^2) - k \ln(n) \quad (13)$$

$$E[\sigma^2] = \frac{\frac{SSR}{2} + \frac{(\beta_0 - \beta_{OLS}) \mathbf{G} \mathbf{X}' \mathbf{X} \mathbf{G} (\beta_0 - \beta_{OLS})}{2}}{\frac{n}{2} - 1} \quad (14)$$

$$E[BIC] = n \left( \ln\left(\frac{SSR}{2} + \frac{(\beta_0 - \beta_{OLS}) \mathbf{G} \mathbf{X}' \mathbf{X} \mathbf{G} (\beta_0 - \beta_{OLS})}{2}\right) - \text{Digamma}\left(\frac{n}{2}\right) - k \ln(n) \right) \quad (15)$$

673 We calculate the expected posterior distribution of  $\sigma^2$  (Equation 14) for each  
 674 subset of predictors, and use it to determine the model BIC (Equation 15).  
 675 We then select the model with the smallest  $E[BIC]$ . The predictors in the  
 676 selected subset model for gene  $j$  are TFs which regulate its expression.

### 677 5.9.2. Model Selection: StARS-LASSO

678 Least absolute shrinkage and selection operator (LASSO) (Zou, 2006)  
 679 combined with the Stability Approach to Regularization Selection (StARS)  
 680 (Liu *et al.*, 2010) is a model selection method described in detail in (Miraldi  
 681 *et al.*, 2019). In short, the StARS-LASSO approach is to select the optimal  
 682  $\lambda$  parameter for (Equation 16).  $N$  random subsamples of  $X$  and  $\hat{A}$  without  
 683 replacement subnetworks  $S_{n,\lambda}$  are defined as the non-zero coefficients  $\beta_{n,\lambda}$

684 after LASSO regression. Initially,  $\lambda$  is set large, so that each subnetwork  
685  $S_n$  is highly sparse, and is then decreased, resulting in increasingly dense  
686 networks. Edge instability is calculated as the fraction of times subnetworks  
687 disagree about the presence of a network edge. As  $\lambda$  decreases, the sub-  
688 networks are expected to have increasing edge instability initially and then  
689 decreasing edge instability as  $\lambda$  approaches 0, as (Equation 16) reduces to  
690 OLS and each subnetwork becomes dense.

$$\min_{\beta} \frac{1}{2n} \|X - \hat{A}\beta\|_2^2 - \lambda \|\beta\|_1 \quad (16)$$

691 We choose the largest value of  $\lambda$  such that the edge instability is less than  
692 0.05, which is interpretable as all subnetworks share  $> 95\%$  of edges. This  
693 selection represents a balance between increasing the network size and min-  
694 imizing the instability that occurs when data is sampled.

#### 695 5.10. Multiple Task Network Inference

696 We separate biological samples which represent different states into sep-  
697 arate tasks, learn networks from these tasks, and then combine task-specific  
698 networks into an ensemble network. One method of solving these states is  
699 to sequentially apply a single-task method for network inference (i.e. 5.9.1  
700 or 5.9.2). The networks generated for each task are then rank-combined  
701 into a unified network. The Adaptive Multiple Sparse Regression (AMuSR)  
702 method, described in detail in (Castro *et al.*, 2019), uses a multi-task learn-  
703 ing framework, where each task is solved together.

$$\arg \min_{B, S} \frac{1}{2n} \|X_{d,i} - (S_d + B)\hat{A}_d\|_2^2 + \lambda_s \|S\|_{1,1} + \lambda_b \|B\|_{1,\infty} \quad (17)$$

$$\hat{W} = \hat{B} + \hat{S} \quad (18)$$

704 In (Equation 17),  $\mathbf{B}$  is a block-sparse weight matrix in which the weights  
705 for any feature are the same across all tasks.  $\mathbf{S}$  is a sparse weight matrix  
706 in which the weights for features can vary between tasks. The combination  
707  $\mathbf{W}$  of  $\mathbf{B}$  and  $\mathbf{S}$  (Equation 18) are model weights representing regulatory  
708 interactions between TFs and genes. In short, this method uses adaptive  
709 penalties to favor regulatory interactions shared across multiple tasks in  $\mathbf{B}$ ,  
710 while recognizing dataset specific interactions in  $\mathbf{S}$ . Model hyperparameters  
711  $\lambda_s$  and  $\lambda_b$  are identified by grid search, selecting the model that minimizes  
712 the extended Bayesian Information Criterion (eBIC) (Equation 19), where  
713  $D$  is the number of task datasets, and for dataset  $d$ ,  $n_d$  is the number of  
714 observations,  $X_i^{(d)}$  is gene expression for gene  $i$ ,  $\hat{A}^{(d)}$  is TF activity estimates,

715  $W_{*,d}$  is model weights,  $k_d$  is the number of non-zero predictors, and  $p_d$  is  
716 the total number of predictors. For this work, we choose to set the eBIC  
717 parameter  $\gamma$  to 1.

$$eBIC = \frac{1}{D} \sum n_d \ln \frac{1}{n_d} \|X_i^{(d)} - \hat{A}^{(d)T} W_{*,d}\|_2^2 + k_d \ln n_d + 2\gamma \ln \binom{p_d}{k_d} \quad (19)$$

### 718 5.11. Network Performance Metrics

719 Prior work has used the area under the Precision (Equation 20) - Re-  
720 call (Equation 21) curve to determine performance, by comparing to some  
721 known, gold-standard network. Here we add two metrics; Matthews cor-  
722 relation coefficient (Matthews, 1975) (MCC) (Equation 22) and F1 score  
723 (Equation 23). MCC can be calculated directly from the confusion matrix  
724 True Positive (TP), False Positive (FP), True Negative (TN), and False  
725 Negative (FN) values.

$$Precision = \frac{TP}{TP + FP} \quad (20)$$

$$Recall = \frac{TP}{TP + FN} \quad (21)$$

$$MCC = \frac{TP * TN - FP * FN}{\sqrt{(TP + FP)(TP + FN)(TN + FP)(TN + FN)}} \quad (22)$$

$$F1 = 2 * \frac{Precision * Recall}{Precision + Recall} \quad (23)$$

726 We compute an MCC and F1 score for each cutoff along ranked interac-  
727 tions in order to generate MCC and F1 scores for all possible networks in  
728 growing ranked order. The maximum MCC along ranked interactions gives  
729 the subnetwork that has maximum similarity to the comparison network,  
730 accounting for TP, FP, TN, and FN. The maximum F1 along ranked inter-  
731 actions gives the subnetwork that has maximum similarity to the comparison  
732 network accounting for TP, FP, and FN.

### 733 5.12. Visualization

734 Figures were generated with R (R Core Team, 2020) and the common  
735 ggplot2 (Wickham, 2016), umap (McInnes *et al.*, 2018), and tidyverse pack-  
736 ages (Wickham *et al.*, 2019). Additional figures were generated with python  
737 using scanpy (Wolf *et al.*, 2018), matplotlib (Hunter, 2007), and seaborn  
738 (Waskom, 2021). Network diagrams were created with the python package

739 `jp_gene_viz` (Watters, 2019). Schematic figures were created in Adobe Illus-  
740 trator, and other figures were adjusted in Illustrator to improve panelling  
741 and layout.

## 742 **Availability of Data and Materials**

743 The datasets supporting the conclusions of this article are available in  
744 the NCBI GEO repository with accession IDs: GSE125162, GSE144820,  
745 GSE67023, GSE27219, GSE142864. A large number of GEO records were  
746 compiled and normalized in a previous work Tchourine *et al.* (2018) into a  
747 combined dataset which is available on Zenodo (DOI: 10.5281/zenodo.3247754).  
748 Single-cell mouse datasets are publicly available from 10x genomics 10x Ge-  
749 nomics (2017, 2019c,a,b) under a Creative Commons Attribution (CC-BY  
750 4.0) license. Software packages developed for this article are available on  
751 github (<https://github.com/flatironinstitute/inferelator> and <https://github.com/flatironinstitute/inferelator-prior>) and have been re-  
752 leased as python packages through PyPi (<https://pypi.org/project/inferelator/>  
753 and <https://pypi.org/project/inferelator-prior/>). Specific analysis  
754 scripts for this work have been included in Supplemental Data 1.  
755

## 756 **Author’s contributions**

757 CSG contributed to Methodology, Software, Validation, Formal Analy-  
758 sis, Writing – Original Draft Preparation, and Visualization. CJ and GS  
759 contributed to Conceptualization, Methodology, Software, Validation, In-  
760 vestigation, Resources, Data Curation, Formal Analysis, Writing – Original  
761 Draft Preparation, and Visualization. AS contributed to Validation, Data  
762 Curation, Formal Analysis, and Visualization. AW contributed to Software  
763 and Visualization. AT contributed to Software, Writing – Original Draft  
764 Preparation, and Formal Analysis. DC and KT contributed to Software,  
765 Data Curation, and Conceptualization. NDV, NC, RY, and TH contributed  
766 to Software. DG contributed to Supervision, Project Administration, and  
767 Funding Acquisition. EM contributed to Conceptualization, Writing – Orig-  
768 inal Draft Preparation, and Software. RB contributed to Conceptualization,  
769 Writing – Original Draft Preparation, Supervision, Project Administration,  
770 and Funding Acquisition.

## 771 **Additional Files**

- 772 • Supplemental Data 1 is a .tar.gz file containing the prior knowledge  
773 networks used in this work, the gold standard networks used in this



774 work, and the python scripts used to generate the learned networks in  
775 this work

776 • Supplemental Data 2 is a .tar.gz file containing the mouse E18 neuronal  
777 network learned in Figure 6 of this work

778 • Supplemental Table 1 is a .tsv file containing the crossvalidation per-  
779 formance results from Figure 2

780 • Supplemental Table 2 is a .tsv file containing the crossvalidation per-  
781 formance results from Figure 3

782 • Supplemental Table 3 is a .tsv file containing the crossvalidation per-  
783 formance results from Figure 4B-D

784 • Supplemental Table 4 is a .tsv file containing the crossvalidation per-  
785 formance results from Figure 4G

786 • Supplemental Table 5 is a .tsv file containing the crossvalidation per-  
787 formance results from Supplemental Figure 5A

788 • Supplemental Table 6 is a .tsv file containing the crossvalidation per-  
789 formance results from Figure 4H

790 • Supplemental Table 7 is a .tsv file containing the crossvalidation per-  
791 formance results from Supplemental Figure 3

## 792 6. Response to Reviewers

793 We'd like to thank all of the reviewers for the time that they've spent  
794 evaluating this manuscript. We believe that the revised manuscript is sub-  
795 stantially improved thanks to these comments. To summarize, the most  
796 important concern raised by reviewers 1, 3, and 4 is that there is no ade-  
797 quate benchmark against other network inference algorithms. Reviewer 1  
798 has also raised several textual concerns, suggested tests for robustness, and  
799 requested clarification on two points related to model design. Reviewer 2  
800 has raised a mathematical argument suggesting that this method is flawed  
801 in concept. Reviewer 3 has also raised several specific concerns about the  
802 prior and testing networks and the interpretation of inferred networks. Fi-  
803 nally, Reviewer 4 has raised several interesting points related to some subtle  
804 observations in our model performance.

### 805 6.1. Summary of Changes

806 As the most general concern, we address benchmarking first. We initially  
807 chose not to include competitive benchmarks against other network inference  
808 methods. A neutral benchmarking panel (as recommended by Reviewer 1)  
809 is an excellent suggestion and we have included an evaluation of the Inferela-  
810 tor on the BEELINE standard as a new supplemental figure (Supplemental  
811 Figure 3). We note that the BEELINE benchmarking is not designed for  
812 network inference tools which utilize prior network knowledge during infer-  
813 ence (it is a benchmark built around pseudotime). While the Inferelator is  
814 adequate to that benchmark, additional benchmarking is necessary.

815 We have additionally tested two other single-cell network inference tools  
816 which utilize prior network knowledge (SCENIC and CellOracle) on the  
817 yeast single-cell network inference problem as a benchmark. Yeast is a  
818 model organism with real-world single-cell data and which has a reliable  
819 gold standard that we can use for performance quantification. We report  
820 these results in figure 4, panels G-H. We also report the performance of the  
821 GRNBOOST2 network inference method which does not utilize prior data  
822 (one component of the SCENIC pipeline) in figure 4H.

823 In short, the Inferelator is the only method which can learn edges for  
824 genes which no prior knowledge is known, and is robust to noise in the prior  
825 knowledge network. CellOracle performs very well when given a prior knowl-  
826 edge network and asked to make predictions within that network, although  
827 it is more sensitive to noise in the prior knowledge network. We have revised  
828 our runtime benchmark in Supplemental Figure 5A to include SCENIC. We  
829 have also revised the discussion to include the comparative results and to

830 emphasize the importance of the model organism benchmark we've chosen  
831 for this work.

832 In accordance with Reviewer 1's suggestions, we have revised the in-  
833 troduction to cover prior work and community benchmarks. We have also  
834 revised the discussion to better justify the modeling strategy in the context  
835 of the results we show. Supplemental Figure 4 now includes performance  
836 metrics for the yeast benchmark when networks are learned on all cells to-  
837 gether, instead of by task group. We have modified figure 1 to emphasize  
838 that we are scoring on information held out of the modeling.

839 We have predominantly responded to Reviewer 2 in this document, pro-  
840 viding specific theoretical and experimental results to contradict the asser-  
841 tion that our modeling strategy is fatally flawed. We have added a prior  
842 knowledge network experiment where false positive edges are added prior to  
843 modeling in Figure 4H in part to specifically refute the reviewer's assertions.

844 We have added a section to our methods to answer Reviewer 3's questions  
845 about the selection of our prior knowledge and gold standard networks.  
846 Reviewer 4 requested interpretation of several subtle observations in our  
847 results. We have modified Figure 4B-D and added runtime benchmarks for  
848 SCENIC to Supplemental Figure 5.

849 We also note that during this revision, we identified a minor error in  
850 the construction of the yeast single-cell expression data (several genes were  
851 inadvertently dropped when different data sets were merged). We have fixed  
852 that error and repeated all analyses that used that data set; no conclusions  
853 have changed.

854 Point by point responses to the reviewer comments follow.

855 *6.2. Reviewer 1*

856 Comments to the Author Inferelator 3.0 is a new version of the Inferela-  
857 tor that provides a workflow for five different regression and model selection  
858 modules. This version supports single-cell gene expression data and has  
859 better scalability, as shown through experiments with the 10x 1.3 million  
860 cell mouse neuronal dataset. The authors highlight their method for select-  
861 ing regulatory edges to retain in a GRN - ranking regulatory edges by the  
862 amount of target gene variance explained, and selecting a threshold that  
863 maximizes MCC against a known gold standard. The Inferelator tool seems  
864 to be well-documented and available through PyPi and Github.

865 Some major comments suggested for revision:

866 1. Introduction needs a lot of work. Lacks comprehensive discussion of  
867 previous work and of many related methods (such as those in this  
868 benchmarking paper [https://www.nature.com/articles/s41592-019-](https://www.nature.com/articles/s41592-019-0690-6)  
869 [0690-6](https://www.nature.com/articles/s41592-019-0690-6)) and further explanation of 3 model selection methods used in  
870 paper.

871 • We have revised the introduction to give a clearer description of  
872 the inferelator, as well as the two most comparable other meth-  
873 ods (CellOracle and SCENIC). We note that in the interest of  
874 space, we now rely on the excellent work of three benchmarking  
875 papers, including the BEELINE benchmarking paper, to describe  
876 the many other extant methods for network inference.

877 2. The paper does no comparison (of performance, time, memory, or  
878 other measures) of Inferelator to other existing methods, including  
879 SCENIC and others mentioned. Please see benchmarking paper here  
880 for ideas on metrics: [https://www.nature.com/articles/s41592-](https://www.nature.com/articles/s41592-019-0690-6)  
881 [019-0690-6](https://www.nature.com/articles/s41592-019-0690-6)

882 • This is an excellent suggestion. We have chosen to apply the  
883 inferelator to the simulated BEELINE benchmarks, and report  
884 those results in Supplemental Figure 3. Only the BBSR method  
885 for model selection was tested, as there are no separable tasks for  
886 AMuSR in the BEELINE simulated data, and the overall net-  
887 work size is too small to use a stability-based model selection  
888 method like StARS-LASSO. We do note however, that the BEE-  
889 LINE framework was not developed for network inference meth-  
890 ods which utilize prior network knowledge (this is why the BEE-  
891 LINE benchmark evaluates the GENIE3 and GRNBOOST2 com-

892           ponents of SCENIC without running the full SCENIC pipeline;  
893           SCENIC requires prior knowledge).

894           We have therefore chosen to also benchmark SCENIC and Cel-  
895           lOracle on the yeast single-cell network inference problem which  
896           has a reliable gold standard. We report those results in Figure  
897           4G-H. In summary, CellOracle has a number of desirable char-  
898           acteristics in a network inference method, and performs well at  
899           evaluating a prior network for edges to retain. However, it is not  
900           capable of making predictions outside the prior network. The  
901           inferelator performance is somewhat lower than CellOracle when  
902           scored against a gold standard which was not held out of the prior  
903           network, but is capable of making novel predictions outside of the  
904           prior network (and therefore performs well when scored against  
905           a gold standard held out of the prior network). SCENIC is not  
906           capable of making predictions outside of a prior network, and  
907           performs poorly when making predictions within a prior network.  
908           We have also added a set of runtime benchmarks for SCENIC to  
909           Supplemental Figure 5 (CellOracle has not reached a develop-  
910           ment stage where it would be fair to include in a benchmark for  
911           runtime).

912           3. The paper more or less proposes to port their existing regression meth-  
913           ods to single cell data without assessing how peculiarities of single cell  
914           data are affected by their approaches. For example, the authors dis-  
915           cuss the noise inherent in single cell data, robustness of their regression  
916           methods to varying levels of dropout noise (as these can vary from ex-  
917           periment to experiment) can be shown on known ground truth data  
918           generated artificially or using benchmarks from the DREAM GRN  
919           challenge.

920           • This is largely correct - we believe that single-cell data is under-  
921           sampled, but the increased scale of data collection makes that  
922           drawback less critical. We have found Svensson 2020 (<https://doi.org/10.1038/s41587-019-0379-5>) to be generally correct  
923           in all aspects when it comes to interpreting single-cell count data.  
924           We note that the most successful methods for single-cell network  
925           inference generally do not use models which include single-cell  
926           peculiarities (like zero-inflation), but instead rely on models that  
927           are robust to noise (CellOracle, for example, uses bagging regres-  
928           sion, which is in our opinion an elegant choice to minimize the  
929           influence of noise, and that method performs quite well).  
930

931 We have added several sentences to the results to explain this:  
932 Single-cell data is undersampled and noisy, but large numbers of  
933 observations are collected in parallel. As network inference is a  
934 population-level analysis which must already be robust against  
935 noise, we reason that data preprocessing techniques that improve  
936 per-cell analyses (like imputation) are unnecessary. We demon-  
937 strate that this is valid by quantitatively evaluating networks  
938 learned from *Saccharomyces cerevisiae* scRNAseq data with a  
939 previously-defined yeast gold standard.”

940 4. Another interesting experiment is to assess the robustness of networks  
941 using subsampling of the single cell data, networks should be robust  
942 between subsampling strategies.

943 • This is an excellent suggestion, and the reviewer’s point related  
944 to noise is something we have considered at length. We have per-  
945 formed the suggested subsampling experiment in prior work and  
946 found that performance increases as a function of cell count up  
947 to a point where it plateaus ([https://doi.org/10.7554/eLife.](https://doi.org/10.7554/eLife.51254)  
948 51254 Fig 5B). This is consistent with our expectation is that  
949 sampling noise in single-cell expression data is manageable via  
950 increasing N.

951 We therefore choose instead to investigate the effect of noise on  
952 the prior knowledge network, which is noise that we cannot com-  
953 pensate for experimentally (the effect of noise in the prior was a  
954 question raised by Reviewer 4). We have tested the performance  
955 of the Inferelator on yeast single-cell network inference when the  
956 prior network has random noise added and reported the results in  
957 Figure 4H. We find that addition of spurious, false edges to the  
958 prior knowledge network does decrease performance, but only  
959 modestly, indicating that the Inferelator is robust to noise in the  
960 prior knowledge network. A comparison to SCENIC and CellOr-  
961 acle has been provided, in addition to negative controls.

962 5. Another single-cell specific concern I have is the time lag between TF  
963 activity and target expression within a cell. Due to mixing in bulk  
964 samples this seems to be less of a concern, but within a single cell  
965 sample simultaneous observation of both activities may be sparse.

966 • We are unfortunately unable to directly observe TF activity (di-  
967 rect measurement of activity would be exceptionally useful, and  
968 we hope to have that data someday). Instead, we estimate TF

969 activity based on the expression of known gene targets. This  
970 estimate is done per-cell and depends on the current cell gene  
971 expression, and not the TF expression in the past. We there-  
972 fore do not expect there to be a 'time lag' between TF activity  
973 and target expression, as we do not currently incorporate time  
974 or pseudotime information in our single-cell network modeling.  
975 Applying an explicitly dynamic model to network inference is an  
976 area we are actively exploring, but represents an entirely different  
977 modeling approach and would not be suitable for addition to this  
978 work.

979 6. Finally, what is the justification of doing the inference "per cell type",  
980 clustering or partitioning data to some arbitrary level using Leiden or  
981 Louvain does not necessarily define regulatory program-specific cells.  
982 Indeed other approaches such as SCENIC are more local in their learn-  
983 ing of regulatory networks. What effect does the resolution of this  
984 clustering or the neighborhood have on their inference?

985 • SCENIC does not locally estimate GRNs. SCENIC is explicitly a  
986 global method, using prior network knowledge to identify regula-  
987 tory units in a provisional draft network created from global gene  
988 "adjacencies". This global GRN is then applied to each cell (with  
989 the AUCell function) to determine how well each regulatory unit  
990 explains gene expression in that cell as a metric, not as part of  
991 the learning process.

992 We propose (as does CellOracle, which clusters as part of its core  
993 workflow) that using a neighborhood-based clustering approach  
994 allows us to identify groups of cells which are running different  
995 gene regulatory programs. This is of particular value when we are  
996 unable to directly observe chromatin state in complex eukaryotes,  
997 as TF - gene relationships are likely to be dependent on having the  
998 ability to access specific enhancer or promoter regions. Treating  
999 these cells with different chromatin states as separate learning  
1000 tasks allows our method to learn common regulatory network  
1001 components which are active in multiple tasks as well as cluster-  
1002 specific network components which are active in a limited number  
1003 of clusters.

1004 To illustrate the value of task-wise learning, we have added per-  
1005 formance metrics for network inference on the yeast single-cell  
1006 data without task separation to Supplemental Figure 4. We see

1007 that overall performance is substantially diminished when learn-  
1008 ing a network on all cells together, without tasks.

1009 Minor comments:

1010 1. The authors state in the introduction "a major difficulty is that bi-  
1011 ological systems have large numbers of both regulators and targets;  
1012 there is poor network identifiability because many plausible networks  
1013 can explain observed expression data and the regulation of gene ex-  
1014 pression in an organism" It is unclear if the difficulty is due to the  
1015 large numbers of regulators and targets (as it was previously stated  
1016 that only 6% of the human genomes are TFs) or due to redundancy  
1017 of networks/pathways.

1018 • Network size is a difficulty but many large problems exist in ma-  
1019 chine learning, and so is not insurmountable. Many pathways are  
1020 redundant or interdependent in ways that simply cannot be de-  
1021 convoluted computationally (instead requiring careful biological  
1022 perturbation, which may or may not be possible). We can realisti-  
1023 cally generate thousands of networks which offer approximately  
1024 equal explanatory power, and determining which network is cor-  
1025 rect is an unsolved problem. We have revised the introduction to  
1026 make this point clearer.

1027 2. The claim in the discussion that "many of the performance differences  
1028 between gene regulatory network inference methods are not due to  
1029 clever methods for model selection, but are instead the result of differ-  
1030 ences in data cleaning and preprocessing" is a strong one and requires  
1031 further citation or evidence.

1032 • We refer to Figure 4, where preprocessing differences dwarf the  
1033 differences between model selection methods (despite using three  
1034 model selection methods which have very different characteris-  
1035 tics). This statement is intended to emphasize the importance of  
1036 using common preprocessing and scoring techniques when com-  
1037 paring network inference methods, as these techniques can in-  
1038 troduce or obscure correlations in both predictable and unpre-  
1039 dictable ways. We understand this to be commonly accepted  
1040 wisdom in the statistical learning field (An early warning about  
1041 data preprocessing from the 19th century is an interesting read:  
1042 <https://doi.org/10.1098/rsp1.1896.0076>). We have revised  
1043 the statement to be more specific: "For example, we find that  
1044 performance differences between our methods of model selection



1045                    may be smaller than differences caused by data cleaning and pre-  
1046                    processing.”

1047                    3. Please report AUPRC ratio (to the random baseline) instead of AUPRC  
1048                    for better understanding of model performance.

1049                    • We have reported an AUPRC ratio in addition to AUC for the  
1050                    BEELINE comparison in Supplemental Figure 3. However, we  
1051                    respectfully decline to do so for other analysis in this work. Re-  
1052                    porting AUC as a ratio to baseline is a practice that we do not  
1053                    feel is advisable. We can generate several model baselines - for  
1054                    example, a model baseline from shuffling labels and a model base-  
1055                    line from replacing data are not identical, and may not be equal  
1056                    to a model baseline calculated based on the gold standard den-  
1057                    sity. It is a best practice to generate multiple baselines to control  
1058                    for different things and report them separately. Furthermore, the  
1059                    interpretation of a model that reports an AUPR of 0.5 over a  
1060                    baseline of 0.05 would differ from a model that reports an AUPR  
1061                    of 0.01 over a baseline of 0.001 and this substantial difference  
1062                    would be lost with ratios.

1063                    4. List as a limitation that model is not able to add or learn edges that  
1064                    do not exist in prior networks

1065                    • This is not a limitation of this modeling strategy. A key advan-  
1066                    tage of our work is that we are able to add or learn edges, even  
1067                    when there is no information about a gene in the prior. Model  
1068                    performance as reported in figures 2-4 is based on holding genes  
1069                    out of the prior networks entirely and scoring on these genes for  
1070                    which the model has no prior information. We have modified  
1071                    Figure 1 to clarify this.

1072 *6.3. Reviewer 2*

1073 This manuscript discusses an update to Inferelator (version 3.0). This  
1074 manuscript builds on several other work by the authors (e.g. Inferelator-  
1075 Amusr) and utilizes these methods that are previously developed as part of  
1076 the study.

1077 Due to this reliance on previous methods, the issues present in the au-  
1078 thors' previous work (PMID: 30677040, Catro et al 2019) is also inherited  
1079 in this work and has tainted the results. Consequently, unless theses major  
1080 issues are addressed, there is not much point in reviewing other aspects of  
1081 the manuscript. As a result, I focus on detailing these issues and hope that  
1082 the authors would address and rectify them before moving forward.

1083 The main issue is with the algorithm Inferelator-AMuSr. From the algo-  
1084 rithmic side, this method (PMID: 30677040) is quite interesting and utilizes  
1085 block sparsity and different regularization techniques to learn gene regula-  
1086 tory networks. Unfortunately, the problem formulation is flawed and fol-  
1087 lows a circular logic. This method uses gene (and TF) expression values  
1088 across different conditions + a prior network of gene-TF associations (e.g.  
1089 from ChIP-seq data) as its input. It first uses these datasets to learn TF  
1090 activity and then uses TF activities (in place of TF expression) to recon-  
1091 struct the network. However, it is relatively easy to show that in the best  
1092 case scenario, this algorithm recovers the prior network (without discover-  
1093 ing anything new). While in the practical case in which the algorithms  
1094 themselves rely on various assumptions and add errors, it finds the original  
1095 prior network + added errors, but treats the added errors as new discoveries  
1096 (which is quite dangerous to the research community). I have provided a  
1097 two-page document attached, focusing on the single-task learning version of  
1098 the method, describing and showing this flaw. The same problem also exists  
1099 in the multi-task version of it, but for simplicity I focused here on the single  
1100 task version.

1101 **• For the sake of brevity, we will focus our response on the**  
1102 **specific claims in the accessory PDF without reproducing it**  
1103 **in its entirety**

1104 1. The issue here, however, is that  $\mathbf{W} = \mathbf{P}^T$  is trivially a solution to the  
1105 two-step procedure above. We can see that by replacing this choice of  
1106  $\mathbf{W}$  in Eq 3 to have  $\mathbf{X} = \mathbf{P}\mathbf{A}'$ . But remembering that  $\mathbf{A}'$  was found by  
1107 solving  $\mathbf{X} = \mathbf{P}\mathbf{A}$  (matrix  $\mathbf{A}$  that satisfies this equation), we can see  
1108 that  $\mathbf{X} = \mathbf{P}\mathbf{A}'$  is trivially satisfied. This implies that  $\mathbf{W} = \mathbf{P}^T$  is the  
1109 solution to the AMUSR two-step procedure.

1110 • The reviewer has identified a very valid concern; overfitting is a  
1111 very real danger for any machine or statistical learning method.  
1112 In this work, we explore the use of several regularization methods  
1113 that produce sparse model coefficients (BBSR, StARS-LASSO,  
1114 and AMuSR) to mitigate overfitting risks. Model selection meth-  
1115 ods which regularize  $\mathbf{W}$  will result in recovery of a sparse  $\mathbf{W}$   
1116 where  $\mathbf{W}$  may or may not have the same structure as  $\mathbf{P}$ .

1117 As a trivial conceptual counterexample to illustrate this point,  
1118 allow  $\mathbf{P}$  to be a TFs by genes prior matrix where every value is  
1119 1. The activity estimate  $\mathbf{A}'$  will then have a rank of 1, where all  
1120 TF activities are co-linear. As additional predictors provide no  
1121 additional information, regularization should result in a matrix  $\mathbf{W}$   
1122 which has at most one non-zero entry for each gene, and  $\mathbf{W} \neq \mathbf{P}$ .

1123 As a second conceptual counterexample to illustrate this point,  
1124 allow  $\mathbf{P}$  to be a TFs by genes prior matrix where for half of the  
1125 columns, every value is 0 (as a note, every value is 0 for 43% of  
1126 the genes in our YEASTRACT prior knowledge network  $\mathbf{P}$ ). The  
1127 corresponding rows of the pseudoinverse  $\mathbf{P}^\dagger$  will then also be all  
1128 zeros.  $\mathbf{A}'$  will be entirely independent of gene  $g$  which has no  
1129 non-zero values in the prior matrix, as the gene  $g$  row in  $\mathbf{P}^\dagger$  is  
1130 all zeros.  $\mathbf{A}'$  will still be a valid predictor matrix, and we can  
1131 regress expression of gene  $g$  against  $\mathbf{A}'$  to select TF activities  
1132 which predict expression of  $g$ . These selected predictors will be  
1133 represented as non-zero entries in weight matrix  $\mathbf{W}$  for this gene  
1134  $g$ , and  $\mathbf{W} \neq \mathbf{P}$ .

1135 As a real-world counterexample, we have performed a number  
1136 of tests where the expression matrix  $\mathbf{X}$  is replaced with noise  
1137 (the Noise controls, labeled 'N' in Figure 4 and Supplemental  
1138 Figure 4), and we see that performance on held-out genes drops  
1139 as expected. To further explore this, we have performed a test  
1140 where we take prior matrix  $\mathbf{P}$  and randomly add false positive  
1141 edges (reported in Figure 4H), evaluating performance against  
1142 the gold standard network without holding out any genes from  
1143 the prior network. If the reviewer's assertion of circularity is  
1144 correct, we would expect that  $\mathbf{W}$  would also be filled with false  
1145 positive edges, and performance would drop dramatically as noise  
1146 increases. We see that this is not the case.

1147 2. In the best-case scenario, when the algorithms used to solve the two-  
1148 step procedure above do not use any approximation and do not add

1149 errors, one simply recovers matrix  $\mathbf{P}$ , which we already knew. In the  
1150 more dangerous practical case, algorithms (those that use different  
1151 regularization terms with block sparsity, etc.), add errors and find  $\mathbf{W}$   
1152 that is  $\mathbf{P}^T +$  added error. Then, this focuses the attention to the  
1153 difference of  $\mathbf{W}$  and  $\mathbf{P}^T$  as new discoveries, while in reality these are  
1154 simply added errors by algorithms

1155 • While some connections added by network inference are undoubt-  
1156 edly spurious, it is not the case that all must be. As a trivial  
1157 counterexample, imagine three genes (A, B, and C) where genes  
1158 A and B are strongly positively correlated and genes A and C are  
1159 strongly negatively correlated. If the prior network contains an  
1160 edge linking TF-1 to gene A, the activity of TF-1 will correlate  
1161 with expression of gene A. The activity of TF-1 is then likely to  
1162 be a useful predictor for the expression of genes B and C, able  
1163 to explain a substantial amount of the variance observed in the  
1164 data. An output network  $\mathbf{W}$  where TF-1 is connected to genes  
1165 A, B, and C is therefore a perfectly reasonable learned network  
1166 which has new edges which are not present in the prior  $\mathbf{P}$ .

1167 As a real-world counterexample, we note that the results reported  
1168 in Figures 2-4 are reported on genes for which no prior informa-  
1169 tion was provided. If the reviewer's assertion that all learned  
1170 edges are errors by the algorithm is correct, we would expect this  
1171 to perform no better than the negative controls where labels have  
1172 been shuffled which are presented in figure 4 (the Shuffled con-  
1173 trol, labeled 'S' in Figure 4 and Supplemental Figure 4). We see  
1174 that this is not the case.

1175 • We have shown that the specific mathematical concerns here are ad-  
1176 dressed in our modeling, but would also like to emphasize that the over-  
1177 all point that this reviewer is making is VERY valid. In the absence  
1178 of some constraints, which invariably take the form of prior knowledge  
1179 related to the network structure, the only information available from  
1180 expression is correlative in nature, yielding networks edge that rep-  
1181 resent co-expression and have no association with causality. For this  
1182 reason, the other methods we have benchmarked both incorporate the  
1183 same prior information - SCENIC requires a prior TF-Gene ranking  
1184 file and TF-Gene binary motif connection file, and CellOracle requires  
1185 a genes by TFs prior matrix of the same type as the prior we use. We  
1186 explicitly embed our prior information into a latent TF activity layer.

1187 We believe that it is very important to be clear about this inclusion,  
1188 as it does create risks (as the reviewer has intuited). The modeling  
1189 may recover the existing network information that we put in, and lit-  
1190 tle else. This is a systemic problem for the network inference field  
1191 and highlights the importance of the negative controls which we have  
1192 included in this work (and which are sadly not ubiquitous when eval-  
1193 uating network inference tools). A comprehensive examination of the  
1194 circularity problems in the current state of the art for network infer-  
1195 ence would be a very interesting paper that would add substantially  
1196 to the literature, but would effectively be an entirely new manuscript  
1197 and therefore would not fit into this work (I would love to read it if  
1198 the reviewer were interested in writing it).

1199 *6.4. Reviewer 3*

1200 INTRODUCTION This paper describes Inferelator 3.0, the latest itera-  
1201 tion of the Inferelator family of GRN inference algorithms. The latest version  
1202 differs from the previous version in that it is a Python implementation that  
1203 uses large-scale parallelization to enable processing of single-cell RNA-Seq  
1204 (scRNA-Seq) data from up to  $10^5$  cells. Otherwise, its basic pipeline and  
1205 gene-expression modeling methodology are similar to those previously re-  
1206 ported in Castro (et al., 2019) from the same lab. The paper does not make  
1207 any claims about how accurate this new algorithm is compared to Inferelator  
1208 2.0, compared to any of the other leading algorithms that are available, or  
1209 on any absolute scale. Primarily, it describes and evaluates several variants  
1210 the authors tried before settling on the final Inferelator 3.0 algorithm.

1211 INTEREST TO POTENTIAL READERS It is not clear who the in-  
1212 tended audience for this paper is. Logical possibilities would be other re-  
1213 searchers working on network inference, potential users of network inference  
1214 algorithms, and possibly those interested in the biology of the networks pro-  
1215 duced. The first two groups will be interested only if the paper provides  
1216 rigorous performance comparisons to other algorithms, including Inferelator  
1217 2 and many or most of the leading competitors. Those interested in the bio-  
1218 logical implications of the networks themselves would require a much deeper  
1219 analysis of the resulting networks than is currently provided.

1220 MAJOR CLAIMS I was not able to identify any claims other than  
1221 that certain alternative ways of implementing components of Inferelator 3.0  
1222 worked better than others. Looking at the subsections of Results:

- 1223 1. 2.1 The natural claim here would be that the new Python implemen-  
1224 tation runs faster than the previous implementation. However, no  
1225 statements regarding speed or other desirable qualities are made.
- 1226 2. 2.2. This section compares two expression modeling algorithms the  
1227 authors considered using, BBSR and StARS-LASSO, and concludes  
1228 that there is no difference. It also describes AMuSR, published by  
1229 many of the same authors in 2019, as being better than either of BBSR  
1230 or StARS-LASSO at dealing with batch effects, so they use AMuSR  
1231 in Inferelator 3.0. This reports on the authors' thought process during  
1232 the design of Inferelator 3.0, but it does not make any claims about  
1233 Inferelator 3.0 itself.
- 1234 3. 2.3. This section compares different ways the authors considered  
1235 putting together a prior network for Inferelator. They observe that  
1236 two of the methods produce networks that are similar to each other  
1237 but not similar to the network obtained from the Yeastract database.

1238 This raises questions about the status of Yeastract as a gold standard  
1239 (see below), but it does not make any specific claims. For example, it  
1240 does not claim that the Inferelator-prior accessory package they im-  
1241 plemented is any better than the existing CellOracle package.

1242 4. 2.4 This section reports on various preprocessing approaches the au-  
1243 thors considered when implementing Inferelator 3.0, but it does not  
1244 make any claims about Inferelator 3.0 itself.

1245 5. 2.5 This section describes how Inferelator 3.0 was run on large datasets  
1246 comprising mouse single-cell RNA-Seq and ATAC-Seq data. There is  
1247 no validation of the network. A few sentences are devoted to describ-  
1248 ing the targets of TFs Egr1 and Atf4. While some readers may be  
1249 interested in these two TFs, there is little introduction or explanation  
1250 of why they are of particular interest, among 1500 other TFs.

1251 • We thank the reviewer for these comments. The manuscript has  
1252 been revised to clarify the major claims related to performance in  
1253 our manuscript, and we have added a number of benchmarks against  
1254 comparable network inference tools. The reviewer will find this re-  
1255 vised manuscript greatly improved by their suggestions for explicit  
1256 comparisons to other network inference leading methods. Based on  
1257 this high-quality benchmarking, we claim several specific advantages  
1258 over other extant network inference methods related to discovering in-  
1259 formation not present in the prior knowledge network and robustness  
1260 to noise in that network.

1261 We would like to note that CellOracle is a contemporaneously de-  
1262 veloped method (it is currently in an alpha state with an associated  
1263 preprint). Both the inferelator-prior and CellOracle methods for gen-  
1264 erating prior knowledge networks from motif data are functional, al-  
1265 though they generate different prior knowledge networks using dif-  
1266 ferent selection criteria. We do not claim that our method for gen-  
1267 erating prior knowledge networks is superior (their methodology is  
1268 quite sound). We do claim that our benchmarking (using real-world  
1269 model-organism data, and testing on a reliable gold standard using  
1270 information held out of the modeling process) is superior to other net-  
1271 work inference benchmarks which do not adhere to good practices for  
1272 machine learning.

1273 The reviewer's note that we have not validated the large mouse neu-  
1274 ronal network in this work is correct; unfortunately, no rigorous gold  
1275 standard exists or can be reasonably constructed (a systematic prob-  
1276 lem which afflicts all work on mammalian network inference). Several

1277 network-wide analyses for the mouse neuronal network are provided  
1278 in Supplemental Figure 7, but the most appropriate validation for this  
1279 network is experimental. We will add a reference to our manuscript  
1280 currently in-press which learns new biology by experimentally validat-  
1281 ing an inferred network.

## 1282 RIGOROUS EVIDENCE TO SUPPORT THE CLAIMS

1283 1. Both the Inferelator-internal claims that are made in the current ver-  
1284 sion of the paper and the comparative claims that might be made  
1285 in a revision require rigorous evaluation of network accuracy. That  
1286 starts with a clear definition of what it means for a network edge to  
1287 be correct. For instance, is the binding of the TF in the regulatory  
1288 DNA of the target gene necessary for correctness? Is it sufficient for  
1289 correctness? What about if the predicted target changes in expression  
1290 level when the TF is perturbed? Such a change could be caused by  
1291 many mechanisms, including mechanisms that are mediated by cell  
1292 states such as growth rate or metabolic state rather than regulatory  
1293 networks. Would such changes be considered sufficient for an edge  
1294 to be correct? Is a change in expression necessary for an edge to be  
1295 correct?

1296 • The reviewer has identified a subtle, but very important point.  
1297 In the Inferelator framework, an edge is an hypothesis supported  
1298 by the input data, for which we report summary statistics such as  
1299 variance explained, and ranked confidence over bootstraps. Our  
1300 statistical learning explanation is that the framework does not  
1301 make any assumptions about the interpretation of an edge; this  
1302 is the purview of the user, who should select a prior knowledge  
1303 network and a gold standard based on how they expect their  
1304 biological system to function.

1305 As biologists, we argue that binding to DNA is not necessary,  
1306 which is fortunate - even in a well studied model organism like  
1307 *Saccharomyces cerevisiae*, the number of TFs which have been  
1308 conclusively shown to bind DNA is very limited (most in vivo  
1309 studies of TF binding are, strictly speaking, studies of localiza-  
1310 tion only). We do expect that a TF which causally regulates a  
1311 gene will localize to that gene in some cellular states. Differen-  
1312 tial expression of a target gene after a TF is perturbed is also  
1313 not strictly necessary, although we expect that it will occur in  
1314 some cellular states. The most accurate answer to the reviewer's



1315 question is that both localization and expression changes are con-  
1316 ditionally necessary for a TF - gene regulatory edge, but in any  
1317 arbitrary cellular state it is not necessary that they occur. We  
1318 have added a clarification on this point to the methods section.

1319 2. Once the intended meaning of the network is made clear, the gold  
1320 standard for evaluation must match the intended meaning. If binding  
1321 is considered necessary for correctness, the network should be eval-  
1322 uated against evidence of binding. If functional effect is considered  
1323 necessary, it should be evaluated against perturbation-response data.

1324 • We have selected a prior knowledge network based on criteria  
1325 that match our biological interpretation. The YEASTRACT  
1326 prior knowledge network is consists of TF - gene edges for which  
1327 some evidence exists for both localization and for gene expression  
1328 changes upon TF perturbation. The yeast gold standard which  
1329 we use was selected for the same criteria, although with a more  
1330 rigorous requirement for experimental support.

1331 Unfortunately, rigorous celltype-specific genome-scale TF pertur-  
1332 bation data is still unavailable for many mammalian systems,  
1333 and consequently the prior knowledge networks we use from the  
1334 inferelator-prior pipeline represent predicted TF - gene localiza-  
1335 tion. This highlights why we consider experimental validation  
1336 to be important, as expression changes when we perturb the TF  
1337 provides strong supporting evidence.

1338 The gold standards the authors use for *B. subtilis* and *S. cerevisiae*  
1339 are described as being curated and/or literature derived. Most edges  
1340 in Yeabstract are derived from a small number of large scale, high-  
1341 throughput datasets. To the best of my knowledge, no judgments are  
1342 made as to the quality of the data or the conclusions. Thus, Yeas-  
1343 tract is better described as a compilation of (mostly) high-throughput  
1344 datasets with references, rather than a curated network. While it is  
1345 literature derived in the sense that there are papers associated with  
1346 the high-throughput datasets, one should not conclude from this that  
1347 these literature-derived edges are in any sense more accurate or reliable  
1348 than high-throughput datasets typically are. And Yeabstract includes  
1349 datasets that are quite old and generally believed to be less reliable  
1350 than more some more recent datasets.

1351 • The reviewer is correct about the YEASTRACT database. While  
1352 the YEASTRACT prior knowledge network is useful, we do agree

1353 that it is not ideally suited for use as a gold standard (largely for  
1354 the reasons that the reviewer has identified). We therefore use  
1355 a curated *S. cerevisiae* curated gold standard, as described in  
1356 <https://doi.org/10.1016/j.celrep.2018.03.048>.

1357 This gold standard has edges which have evidence from at least  
1358 three experiments, and which have evidence of both TF local-  
1359 ization and gene expression changes after perturbation. We note  
1360 that this results in a relatively small gold standard network, but  
1361 as these are (we believe) the highest confidence edges, it is still  
1362 a valid way to benchmark using ranked measures (e.g. AUPR).  
1363 We are careful not to use unranked metrics (like Jaccard) when  
1364 evaluating network performance against this gold standard. We  
1365 have clarified this in the methods section.

1366 3. Potential readers who are interested in using network inference algo-  
1367 rithms need to know which algorithm they should choose, based on  
1368 accuracy comparison and possibly resource requirements. They also  
1369 need to know what level of performance they should expect if choose  
1370 Inferelator 3.0. For example, if they take all edges scoring above some  
1371 threshold, what fraction of those edges can they expect to be supported  
1372 by evidence from the gold standard?

1373 • A key aspect of this work is how to properly threshold a regu-  
1374 latory network. Metrics like the F1 score or the matthews cor-  
1375 relation coefficient proposed here use information from the gold  
1376 standard or prior knowledge network to identify optimal thresh-  
1377 olds for retaining edges. We argue that this principled method  
1378 of choosing thresholds is superior to selection of some threshold,  
1379 provided that the network used for scoring is of useful quality.  
1380 These metrics are valuable as they take into account true posi-  
1381 tives, false positives, and false negatives in a way that an accuracy  
1382 measure would not - particularly as biological networks are highly  
1383 imbalanced in positive and negative edges, a situation where an  
1384 accuracy metric is generally unwise.

1385 To directly address the concern of the reviewer, we have chosen  
1386 to compare our work to SCENIC and CellOracle as they are the  
1387 most comparable alternatives for single-cell network inference.  
1388 The preprocessing (e.g. TF activity) and model selection meth-  
1389 ods built for older versions of the Inferelator developed in R (e.g.  
1390 the BBSR model selection method) have been reimplemented in  
1391 the python-based package which we present here. Based on our

1392 extensive software testing framework, we are confident that the  
1393 output of these reimplemented methods are valid and equiva-  
1394 lent to those in the Inferelator 2.0. Our expectation is that the  
1395 performance of the original R package and the current python  
1396 package would be very similar when using the same preprocess-  
1397 ing and model selection methods, if the out-of-date R package  
1398 were capable of handling data at this scale (it is not able to han-  
1399 dle the staggering number of observations present in single-cell  
1400 data sets).

1401 6.5. Reviewer 4

1402 Major:

1403 1. Using the prior network reconstruction from both CellOracle and Inferelator-  
1404 prior results in lower AUPR than using one from YEASTRACT. Do  
1405 the authors have an explanation for this? How accurate/complete does  
1406 this prior need to be?

1407 • This is a very interesting observation on a topic that we've con-  
1408 sidered at some length. To put it simply - the strategy of using  
1409 TF motifs to scan regulatory regions for potential binding will re-  
1410 sult in poor results for many (or perhaps most) TFs. We suspect  
1411 the reasons for this are twofold - first is that TF motifs them-  
1412 selves are of highly variable reliability. Some TFs (e.g. GAL4)  
1413 have been extensively studied and the DNA binding has been  
1414 directly measured, but most TF motifs are derived from CHIP  
1415 data, which is more indirect. Lower quality motifs will just give  
1416 poorer estimates of regulation.

1417 The second reason is that both motif-scanning pipelines treat TFs  
1418 as discrete units that can be modeled in isolation, and that's just  
1419 not reflective of the underlying biology in many cases. Some TFs  
1420 bind cooperatively with other TFs or chromatin readers, and we  
1421 are unable to account for these types of interaction effects. We  
1422 also suspect that motifs derived only from CHIP localization data  
1423 for TFs are less likely to be reliable, as localization is driven by  
1424 factors other than DNA sequence, but we have not directly tested  
1425 that hypothesis.

1426 That said, we do not believe that the prior for the inferelator  
1427 needs to be particularly accurate or complete. TFs for which no  
1428 accurate predictions have been made in the prior network will  
1429 unfortunately likely be poorly modeled in the final network, but  
1430 so long as there is some signal in the noise we believe that mod-  
1431 eling performance will be reasonable. We've tested this in Figure  
1432 4H by taking a the YEASTRACT prior network (which we be-  
1433 lieve to be the most accurate prior knowledge network we have  
1434 available) and filling it with randomly generated edges. The re-  
1435 sulting network inference performance is quite stable, given that  
1436 the true prior network edges are outnumbered (up to 10:1) by  
1437 false positive edges.

1438 2. Interestingly, in applying Inferelator 3.0 to single-cell yeast data, the  
1439 authors found decreases in performance associated with depth-normalized

1440 data, suggesting total counts per cell carries some information in in-  
1441 ference. This doesn't seem to be the case when using BBSR model  
1442 selection. Can the authors speculate on why this is the case?

1443 • This is also a very interesting observation of a subtle effect. As a  
1444 best-subset regression method that uses the Bayesian Information  
1445 Criterion, BBSR model selection favors simpler models. There is  
1446 an initial feature selection based on mutual information which  
1447 greatly restricts the number of considered features prior to best-  
1448 subset regression (this is unfortunately necessary as best-subset  
1449 regression scales exponentially with the number of predictors).  
1450 Predictor variables (TFs) which are only weakly linked to gene  
1451 expression through correlation from total count depth are likely  
1452 to be excluded in this initial filter and not considered during re-  
1453 gression. We note that the performance of AMuSR and BBSR  
1454 are very similar when cell count depth is normalized - the dif-  
1455 ference is that AMuSR performs better on non-depth-normalized  
1456 expression data, and BBSR performance does not change. Inter-  
1457 pretation of the original Figure 4 was needlessly difficult as the  
1458 y-axis was scaled differently in panels B, C, and D. We have fixed  
1459 the y-axis scaling in panels B, C, and D in the revised Figure 4  
1460 so that they are identical.

1461 3. I'd be interested to understand the limits of Inferelator 3.0 in terms  
1462 of scalability, which seems to be the main draw of this tool. Recon-  
1463 struction on 1.3 million single-cells seems impressive (even if divided  
1464 into 36 clusters), I wonder how long that took, and how scalability  
1465 compares to previous versions and other single-cell based methods.

1466 • This is an excellent question, as this is a lot of data. Our in-  
1467 ference approach uses bootstrapping networks (internally rank-  
1468 ing network edges by variance explained), and the full network  
1469 reported in figures 5 & 6 took approximately 3350 cpu-hours to  
1470 calculate each bootstrap network (around 10 minutes per cpu per  
1471 gene). We tested this again on the newest version of the Infe-  
1472 relator (which has some additional optimizations) and the newest  
1473 version of Dask and found it decreased to 1400 cpu-hours (the  
1474 output is identical). We're fortunate to have excellent computa-  
1475 tional resources, but this is a lot of computational time.

1476 We have included a runtime benchmark (without task learning)  
1477 as Supplemental Figure 5A that compares runtime between the  
1478 Inferelator and SCENIC, the most scalable of the existing net-

1479 work inference tools. At 140k cells, the Inferelator can complete  
1480 network runs in around an hour, but with equal resources the run-  
1481 time of SCENIC using GENIE3 is out of a testable range, and  
1482 SCENIC using GRNBOOST2 dies with cryptic memory errors.  
1483 Prior iterations of the Inferelator were written for bulk RNA-seq  
1484 data at a much lower scale. We are quite confident, based on  
1485 how much of it had to be rewritten to efficiently utilize memory,  
1486 that earlier versions of the Inferelator are not able to handle 140k  
1487 cells either. That having been said, we intend to continue devel-  
1488 oping the Inferelator, as every time we catch up to the size of  
1489 large single-cell data sets, someone publishes something 10 times  
1490 larger. There are a number of techniques for scalability that we  
1491 think we can take advantage of, now that we are built around a  
1492 powerful (dask) parallelization library.

1493 4. Benchmarking: it would be useful to put this tool in context of others  
1494 in terms of AUPR, runtime, etc. (i.e. some of the ones mentioned in  
1495 the background section)

1496 • This is a suggestion raised by (all) other reviewers, and we have  
1497 added several benchmarks. We have included performance bench-  
1498 marks against the synthetic data in BEELINE (Supplemental  
1499 Figure 4), and added SCENIC and CellOracle to the yeast single-  
1500 cell benchmarking in Figure 4. We have also contextualized the  
1501 advantage of task-based learning by adding the non-task per-  
1502 formance against the yeast single-cell benchmark to Supplemental  
1503 Figure 4. Finally, we have added a runtime benchmark of  
1504 SCENIC to our runtime benchmarking in Supplemental Figure  
1505 5.

1506 Minor

1507 1. missing pointer in line 193

1508 2. References seem to be garbled in lines 284-7

1509 • We have corrected these errors.

## 7. Acknowledgements

### Funding

This work was supported by the NSF [MCB-1818234, IOS-1546218], the NIH [R35GM122515, R01HD096770, R01NS116350, R01GM107466, R01GM134066, R01AI140766], and the Simons Foundation.

## Acknowledgements

We thank past and present members of the Gresham, Miraldi, and Bonneau labs for discussions and valuable feedback on this manuscript. We also thank the staff of the Flatiron Institute Scientific Computing Core for their tireless efforts to build and maintain the High Performance Computing resources which we rely on. This work was supported in part through the NYU IT High Performance Computing resources, services, and staff expertise.

## References

- 10x Genomics (2017). 1.3 million brain cells from e18 mice. [https://support.10xgenomics.com/single-cell-gene-expression/datasets/1.3.0/1M\\_neurons](https://support.10xgenomics.com/single-cell-gene-expression/datasets/1.3.0/1M_neurons).
- 10x Genomics (2019a). Dissociated and cryopreserved cortex, hippocampus, and ventricular zone cells from embryonic mouse brain (e18). [https://support.10xgenomics.com/single-cell-atac/datasets/1.2.0/atac\\_v1\\_E18\\_brain\\_cryo\\_5k](https://support.10xgenomics.com/single-cell-atac/datasets/1.2.0/atac_v1_E18_brain_cryo_5k).
- 10x Genomics (2019b). Flash frozen cortex, hippocampus, and ventricular zone from embryonic mouse brain (e18). [https://support.10xgenomics.com/single-cell-atac/datasets/1.2.0/atac\\_v1\\_E18\\_brain\\_flash\\_5k](https://support.10xgenomics.com/single-cell-atac/datasets/1.2.0/atac_v1_E18_brain_flash_5k).
- 10x Genomics (2019c). Fresh cortex, hippocampus, and ventricular zone from embryonic mouse brain (e18). [https://support.10xgenomics.com/single-cell-atac/datasets/1.2.0/atac\\_v1\\_E18\\_brain\\_fresh\\_5k](https://support.10xgenomics.com/single-cell-atac/datasets/1.2.0/atac_v1_E18_brain_fresh_5k).
- Arisdakessian, C. et al (2019). DeepImpute: an accurate, fast, and scalable deep neural network method to impute single-cell RNA-seq data. *Genome Biol.*, **20**(1), 211.
- Arrieta-Ortiz, M.L. et al (2015). An experimentally supported model of the bacillus subtilis global transcriptional regulatory network. *Mol. Syst. Biol.*, **11**(11), 839.
- Bailey, T.L. et al (2009). MEME SUITE: tools for motif discovery and searching. *Nucleic Acids Res.*, **37**(Web Server issue), W202–8.

- Bonneau, R. et al (2006). The inferelator: an algorithm for learning parsimonious regulatory networks from systems-biology data sets de novo. *Genome Biol.*, **7**, R36.
- Castro, D.M. et al (2019). Multi-study inference of regulatory networks for more accurate models of gene regulation. *PLoS Comput. Biol.*, **15**(1), e1006591.
- Chasman, D. et al (2016). Network-based approaches for analysis of complex biological systems. *Curr. Opin. Biotechnol.*, **39**, 157–166.
- Chen, S. and Mar, J.C. (2018). Evaluating methods of inferring gene regulatory networks highlights their lack of performance for single cell gene expression data. *BMC Bioinformatics*, **19**(1), 232.
- Ciofani, M. et al (2012). A validated regulatory network for th17 cell specification. *Cell*, **151**(2), 289–303.
- Dale, R.K. et al (2011). Pybedtools: a flexible python library for manipulating genomic datasets and annotations. *Bioinformatics*, **27**(24), 3423–3424.
- DeRisi, J.L. et al (1997). Exploring the metabolic and genetic control of gene expression on a genomic scale. *Science*, **278**(5338), 680–686.
- Di Bella, D.J. et al (2020). Molecular logic of cellular diversification in the mammalian cerebral cortex.
- Dixit, A. et al (2016). Perturb-Seq: Dissecting molecular circuits with scalable Single-Cell RNA profiling of pooled genetic screens. *Cell*, **167**(7), 1853–1866.e17.
- ENCODE Project Consortium et al (2020). Expanded encyclopaedias of DNA elements in the human and mouse genomes. *Nature*, **583**(7818), 699–710.
- Ester, M. et al (1996). A density-based algorithm for discovering clusters in large spatial databases with noise. In *Proceedings of the Second International Conference on Knowledge Discovery and Data Mining*, KDD'96, pages 226–231. AAAI Press.
- Fang, R. et al (2021). Comprehensive analysis of single cell atac-seq data with snapatac. *Nature Communications*, **12**(1), 1337.



- Fornes, O. et al (2020). JASPAR 2020: update of the open-access database of transcription factor binding profiles. *Nucleic Acids Res.*, **48**(D1), D87–D92.
- Fu, Y. et al (2011). Reconstructing genome-wide regulatory network of *e. coli* using transcriptome data and predicted transcription factor activities. *BMC Bioinformatics*, **12**, 233.
- Gabbito, M.I. et al (2020). Characterizing chromatin landscape from aggregate and single-cell genomic assays using flexible duration modeling. *Nature Communications*, **11**(1), 747.
- Grant, C.E. et al (2011). FIMO: scanning for occurrences of a given motif. *Bioinformatics*, **27**(7), 1017–1018.
- Greenfield, A. et al (2010). DREAM4: Combining genetic and dynamic information to identify biological networks and dynamical models. *PLoS One*, **5**(10), e13397.
- Greenfield, A. et al (2013). Robust data-driven incorporation of prior knowledge into the inference of dynamic regulatory networks. *Bioinformatics*, **29**(8), 1060–1067.
- Hackett, S.R. et al (2020). Learning causal networks using inducible transcription factors and transcriptome-wide time series. *Mol. Syst. Biol.*, **16**(3), e9174.
- Hahn, S. and Young, E.T. (2011). Transcriptional regulation in *saccharomyces cerevisiae*: transcription factor regulation and function, mechanisms of initiation, and roles of activators and coactivators. *Genetics*, **189**(3), 705–736.
- Harris, C.R. et al (2020). Array programming with NumPy. *Nature*, **585**(7825), 357–362.
- Hu, J.X. et al (2016). Network biology concepts in complex disease comorbidities. *Nat. Rev. Genet.*, **17**(10), 615–629.
- Huang, M. et al (2017). Efficient protein production by yeast requires global tuning of metabolism. *Nat. Commun.*, **8**(1), 1131.
- Hunter, J.D. (2007). Matplotlib: A 2D graphics environment. *Computing in Science Engineering*, **9**(3), 90–95.

- Jackson, C.A. et al (2020). Gene regulatory network reconstruction using single-cell RNA sequencing of barcoded genotypes in diverse environments. *Elife*, **9**, e51254.
- Jariani, A. et al (2020). A new protocol for single-cell RNA-seq reveals stochastic gene expression during lag phase in budding yeast. *Elife*, **9**.
- Kadonaga, J.T. (2004). Regulation of RNA polymerase II transcription by sequence-specific DNA binding factors. *Cell*, **116**(2), 247–257.
- Kamimoto, K. et al (2020). CellOracle: Dissecting cell identity via network inference and in silico gene perturbation.
- Kim, J.T. et al (2003). Bioinformatic principles underlying the information content of transcription factor binding sites. *J. Theor. Biol.*, **220**(4), 529–544.
- Lambert, S.A. et al (2018). The human transcription factors. *Cell*, **172**(4), 650–665.
- Lambert, S.A. et al (2019). Similarity regression predicts evolution of transcription factor sequence specificity. *Nat. Genet.*, **51**(6), 981–989.
- Liu, H. et al (2010). Stability approach to regularization selection (StARS) for high dimensional graphical models. *arXiv*.
- Ma, C.Z. and Brent, M.R. (2021). Inferring TF activities and activity regulators from gene expression data with constraints from TF perturbation data. *Bioinformatics*, **37**(9), 1234–1245.
- Macosko, E.Z. et al (2015). Highly parallel genome-wide expression profiling of individual cells using nanoliter droplets. *Cell*, **161**(5), 1202–1214.
- Madar, A. et al (2009). The inferelator 2.0: A scalable framework for reconstruction of dynamic regulatory network models. In *2009 Annual International Conference of the IEEE Engineering in Medicine and Biology Society*, pages 5448–5451.
- Madar, A. et al (2010). DREAM3: Network inference using dynamic context likelihood of relatedness and the inferelator. *PLoS One*, **5**(3), e9803.
- Matthews, B.W. (1975). Comparison of the predicted and observed secondary structure of T4 phage lysozyme. *Biochim. Biophys. Acta*, **405**(2), 442–451.

- Matys, V. et al (2006). TRANSFAC and its module TRANSCompel: transcriptional gene regulation in eukaryotes. *Nucleic Acids Res.*, **34**(Database issue), D108–10.
- McInnes, L. et al (2018). UMAP: Uniform manifold approximation and projection for dimension reduction. *arXiv:1802.03426 [cs, stat]*.
- Mehta, T.K. et al (2021). Evolution of regulatory networks associated with traits under selection in cichlids. *Genome Biol.*, **22**(1), 25.
- Miraldi, E.R. et al (2019). Leveraging chromatin accessibility for transcriptional regulatory network inference in T helper 17 cells. *Genome Res.*
- Monteiro, P.T. et al (2020). YEASTRACT+: a portal for cross-species comparative genomics of transcription regulation in yeasts. *Nucleic Acids Res.*, **48**(D1), D642–D649.
- Nagalakshmi, U. et al (2008). The transcriptional landscape of the yeast genome defined by RNA sequencing. *Science*, **320**(5881), 1344–1349.
- Nguyen, H. et al (2021). A comprehensive survey of regulatory network inference methods using single cell RNA sequencing data. *Brief. Bioinform.*, **22**(3).
- Nicolas, P. et al (2012). Condition-dependent transcriptome reveals high-level regulatory architecture in bacillus subtilis. *Science*, **335**(6072), 1103–1106.
- Papatsenko, D. and Levine, M.S. (2008). Dual regulation by the hunchback gradient in the drosophila embryo. *Proc. Natl. Acad. Sci. U. S. A.*, **105**(8), 2901–2906.
- Pedregosa, F. et al (2011). Scikit-learn: Machine learning in python. *J. Mach. Learn. Res.*, **12**(Oct), 2825–2830.
- Peter, I.S. and Davidson, E.H. (2011). Evolution of gene regulatory networks controlling body plan development. *Cell*, **144**(6), 970–985.
- Pokrovskii, M. et al (2019). Characterization of transcriptional regulatory networks that promote and restrict identities and functions of intestinal innate lymphoid cells. *Immunity*, **51**(1), 185–197.e6.
- Pratapa, A. et al (2020). Benchmarking algorithms for gene regulatory network inference from single-cell transcriptomic data. *Nat. Methods*, **17**(2), 147–154.

- Quinlan, A.R. and Hall, I.M. (2010). BEDTools: a flexible suite of utilities for comparing genomic features. *Bioinformatics*, **26**(6), 841–842.
- R Core Team (2020). *R: A Language and Environment for Statistical Computing*. R Foundation for Statistical Computing, Vienna, Austria.
- Ritchie, M.E. et al (2015). limma powers differential expression analyses for RNA-sequencing and microarray studies. *Nucleic Acids Res.*, **43**(7), e47.
- Rocklin, M. (2015). Dask: Parallel computation with blocked algorithms and task scheduling. In *Proceedings of the 14th Python in Science Conference*, Proceedings of the Python in Science Conference, pages 126–132. SciPy.
- Rosenberg, A.B. et al (2018). Single-cell profiling of the developing mouse brain and spinal cord with split-pool barcoding. *Science*, **360**(6385), 176–182.
- Satija, R. et al (2015). Spatial reconstruction of single-cell gene expression data. *Nat. Biotechnol.*, **33**(5), 495–502.
- Schacht, T. et al (2014). Estimating the activity of transcription factors by the effect on their target genes. *Bioinformatics*, **30**(17), i401–7.
- Schraivogel, D. et al (2020). Targeted perturb-seq enables genome-scale genetic screens in single cells. *Nat. Methods*, **17**(6), 629–635.
- Stuart, T. et al (2019). Comprehensive integration of Single-Cell data. *Cell*, **177**(7), 1888–1902.e21.
- Sun, Z. et al (2019). Egr1 recruits tet1 to shape the brain methylome during development and upon neuronal activity. *Nature Communications*, **10**(1), 3892.
- Svensson, V. (2020). Droplet scRNA-seq is not zero-inflated. *Nat. Biotechnol.*, **38**(2), 147–150.
- Szederkényi, G. et al (2011). Inference of complex biological networks: distinguishability issues and optimization-based solutions. *BMC Syst. Biol.*, **5**, 177.
- Tchourine, K. et al (2018). Condition-Specific modeling of biophysical parameters advances inference of regulatory networks. *Cell Rep.*, **23**(2), 376–388.

- Teixeira, M.C. et al (2018). YEASTRACT: an upgraded database for the analysis of transcription regulatory networks in *saccharomyces cerevisiae*. *Nucleic Acids Res.*, **46**(D1), D348–D353.
- Thompson, D. et al (2015). Comparative analysis of gene regulatory networks: from network reconstruction to evolution. *Annu. Rev. Cell Dev. Biol.*, **31**, 399–428.
- Tjärnberg, A. et al (2021). Optimal tuning of weighted kNN- and diffusion-based methods for denoising single cell genomics data. *PLoS Comput. Biol.*, **17**(1), e1008569.
- Ud-Dean, S.M.M. and Gunawan, R. (2016). Optimal design of gene knockout experiments for gene regulatory network inference. *Bioinformatics*, **32**(6), 875–883.
- Ursu, O. et al (2020). Massively parallel phenotyping of variant impact in cancer with perturb-seq reveals a shift in the spectrum of cell states induced by somatic mutations.
- Van de Sande, B. et al (2020). A scalable SCENIC workflow for single-cell gene regulatory network analysis. *Nat. Protoc.*, **15**.
- Virtanen, P. et al (2020). SciPy 1.0: fundamental algorithms for scientific computing in python. *Nat. Methods*, **17**.
- Waskom, M.L. (2021). seaborn: statistical data visualization. *Journal of Open Source Software*, **6**(60), 3021.
- Watters, A. (2019). jp\_gene\_viz. [https://github.com/simonsfoundation/jp\\_gene\\_viz](https://github.com/simonsfoundation/jp_gene_viz).
- Wes McKinney (2010). Data Structures for Statistical Computing in Python. In Stéfan van der Walt and Jarrod Millman, editors, *Proceedings of the 9th Python in Science Conference*, pages 56 – 61.
- Wickham, H. (2016). *ggplot2: Elegant Graphics for Data Analysis*. Springer-Verlag New York.
- Wickham, H. et al (2019). Welcome to the tidyverse. *J. Open Source Softw.*, **4**(43), 1686.
- Wilkins, O. et al (2016). EGRINs (environmental gene regulatory influence networks) in rice that function in the response to water deficit, high temperature, and agricultural environments. *Plant Cell*, **28**(10), 2365–2384.

- Wolf, F.A. et al (2018). SCANPY: large-scale single-cell gene expression data analysis. *Genome Biol.*, **19**(1), 15.
- Zappia, L. and Theis, F.J. (2021). Over 1000 tools reveal trends in the single-cell RNA-seq analysis landscape.
- Zaret, K.S. (2020). Pioneer transcription factors initiating gene network changes. *Annu. Rev. Genet.*, **54**.
- Zheng, G.X.Y. et al (2017). Massively parallel digital transcriptional profiling of single cells. *Nat. Commun.*, **8**, 14049.
- Zilionis, R. et al (2017). Single-cell barcoding and sequencing using droplet microfluidics. *Nat. Protoc.*, **12**(1), 44.
- Zou, H. (2006). The adaptive lasso and its oracle properties. *J. Am. Stat. Assoc.*, **101**(476), 1418–1429.
- Zou, H. and Hastie, T. (2005). Regularization and variable selection via the elastic net. *J. R. Stat. Soc. Series B Stat. Methodol.*, **67**(2), 301–320.

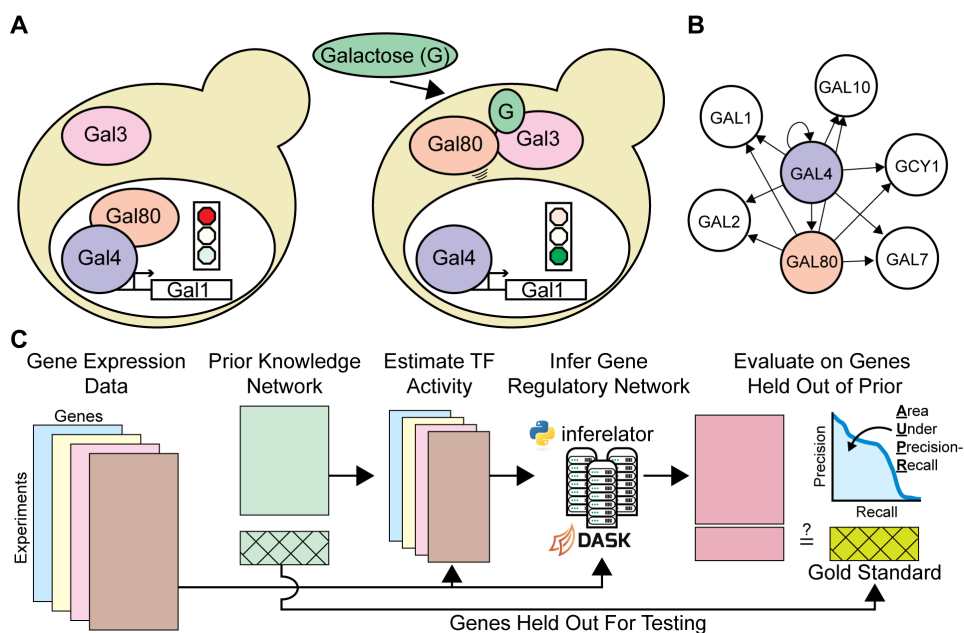

Figure 1: Learning Gene Regulatory Networks with the Inferelator (A) The response to the sugar galactose in *Saccharomyces cerevisiae* is mediated by the Gal4 and Gal80 TFs, a prototypical mechanism for altering cellular gene expression in response to stimuli. (B) Gal4 and Gal80 regulation represented as an unsigned directed graph connecting regulatory TFs to target genes. (C) Genome-wide Gene Regulatory Networks (GRNs) are inferred from gene expression data and prior knowledge about network connections using the Inferelator, and the resulting networks are scored by comparison with a gold standard of known interactions. A subset of genes are held out of the prior knowledge and used for evaluating performance.

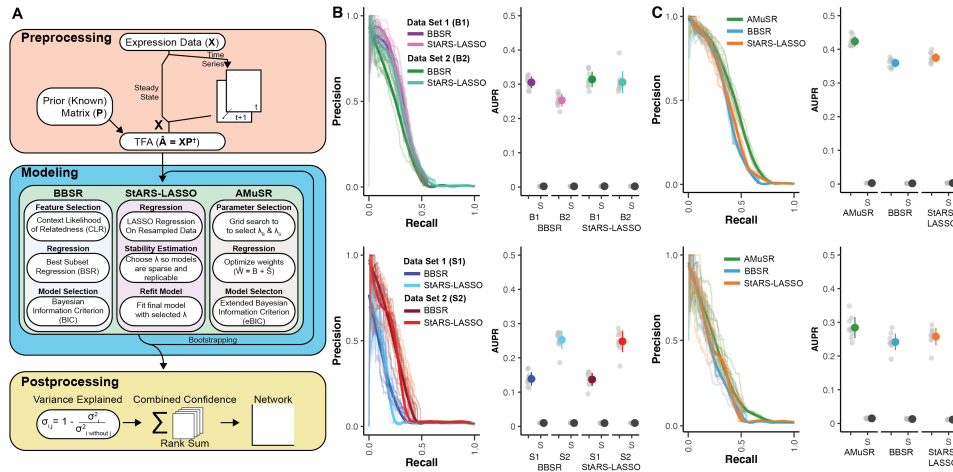

Figure 2: Network Inference Performance on Multiple Model Organism Datasets (**A**) Schematic of Inferelator workflow and a brief summary of the differences between GRN model selection methods (**B**) Results from 10 replicates of GRN inference for each modeling method on (i) *Bacillus subtilis* GSE67023 (B1), GSE27219 (B2) and (ii) *Saccharomyces cerevisiae* GSE142864 (S1), and Tchourine *et al.* (2018) (S2). Precision-recall curves are shown for replicates where 20% of genes are held out of the prior and used for evaluation, with a smoothed consensus curve. AUPR is plotted for each cross-validation result in gray, with mean  $\pm$  standard deviation in color. Experiments labeled with (S) are shuffled controls, where the labels on the prior adjacency matrix have been randomly shuffled. 10 shuffled replicates are shown as gray dots, with mean  $\pm$  standard deviation in black. (**C**) Results from 10 replicates of GRN inference using two datasets as two network inference tasks on (i) *Bacillus subtilis* and (ii) *Saccharomyces cerevisiae*. AMuSR is a multi-task learning method; BBSR and StARS-LASSO are run on each task separately and then combined into a unified GRN. Precision-recall curves and AUPR are plotted as in **B**.



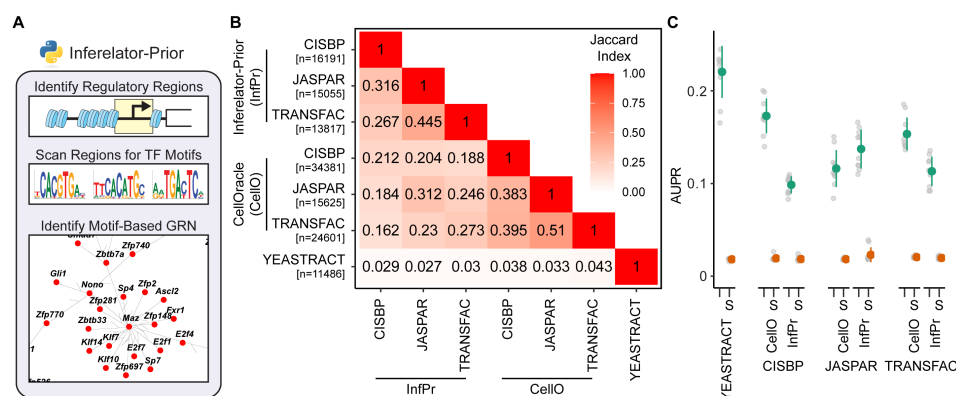

Figure 3: Construction and Performance of Network Connectivity Priors Using TF Motif Scanning (A) Schematic of inferelator-prior workflow, scanning identified regulatory regions (e.g. by ATAC) for TF motifs to construct adjacency matrices (B) Jaccard similarity index between *Saccharomyces cerevisiae* prior adjacency matrices generated by the inferelator-prior package, by the CellOracle package, and obtained from the YEASTRACT database. Prior matrices were generated using TF motifs from the CIS-BP, JASPAR, and TRANSFAC databases with each pipeline (n is the number of edges in each prior adjacency matrix). (C) The performance of Inferelator network inference using each motif-derived prior. Performance is evaluated by AUPR, scoring against genes held out of the prior adjacency matrix, based on inference using 2577 genome-wide microarray experiments. Experiments labeled with (S) are shuffled controls, where the labels on the prior adjacency matrix have been randomly shuffled.

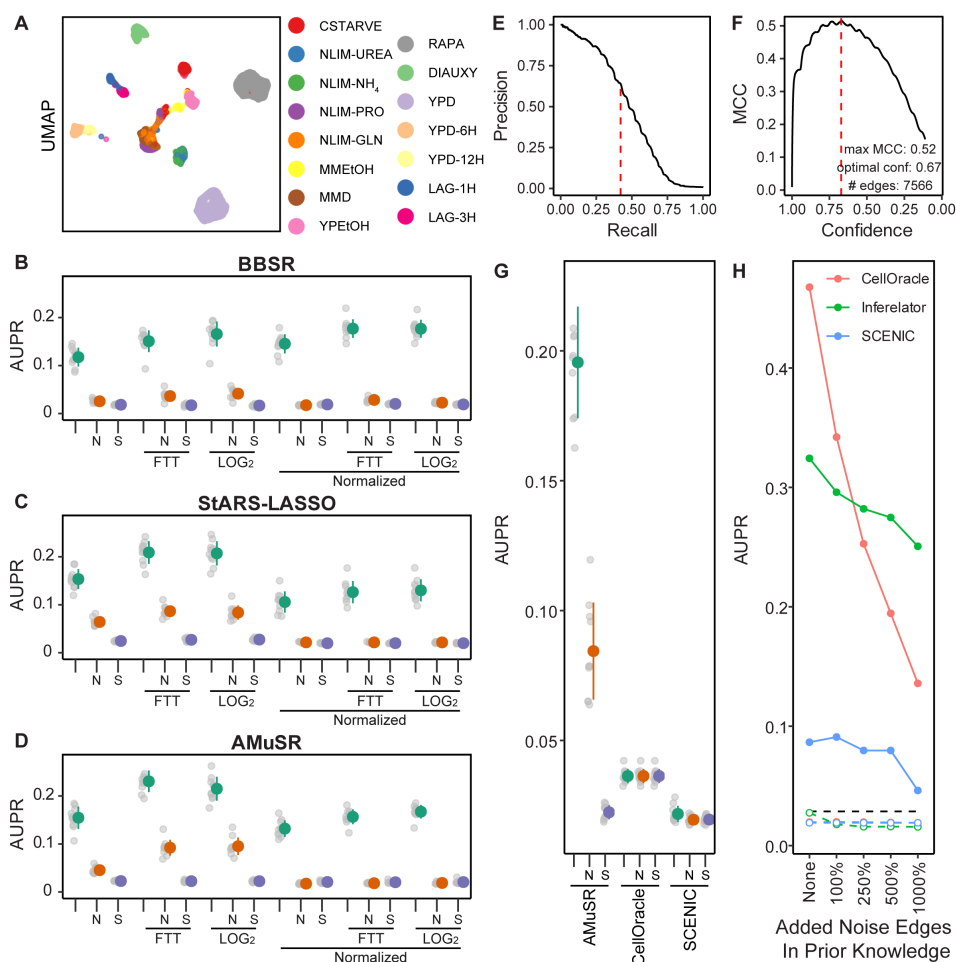

Figure 4: Network Inference Performance Using *Saccharomyces cerevisiae* Single-Cell Data (A) Uniform Manifold Approximation and Projection (UMAP) plot of yeast scRNA-seq data, colored by the experimental grouping of individual cells (tasks). (B) The effect of preprocessing methods on network inference using BBSR model selection on 14 task-specific expression datasets, as measured by AUPR. Colored dots represent mean  $\pm$  standard deviation of all replicates. Data is either untransformed (raw counts), transformed by Freeman-Tukey Transform (FTT), or transformed by  $\log_2(x_1)$  pseudocount. Non-normalized data is compared to data normalized so that all cells have identical count depth. Network inference performance is compared to two baseline controls; data which has been replaced by Gaussian noise (N) and network inference using shuffled labels in the prior network (S). (C) Performance evaluated as in B on StARS-LASSO model selection. (D) Performance evaluated as in B on AMuSR model selection. (E) Precision-recall of a network constructed using FTT-transformed, non-normalized AMuSR model selection, as determined by the recovery of the prior network. Dashed red line is the retention threshold identified by Matthews Correlation Coefficient. (F) Matthews Correlation Coefficient (MCC) of the same network as in E. Dashed red line is the confidence score of the maximum MCC. (G) Performance evaluated as in B comparing the Inferelator (FTT-transformed, non-normalized AMuSR) against the SCENIC and CellOracle network inference pipelines. (H) Performance of the Inferelator (FTT-transformed, non-normalized AMuSR) compared to SCENIC and CellOracle without holding genes out of the prior knowledge network. Additional edges are added randomly to the prior knowledge network as a percentage of the true edges in the prior. Colored dashed lines represent controls for each method where the labels on the prior knowledge network are randomly shuffled. The black dashed line represents performance of the GRNBOOST2 algorithm, which identifies gene adjacencies as the first part of the SCENIC pipeline without using prior knowledge.

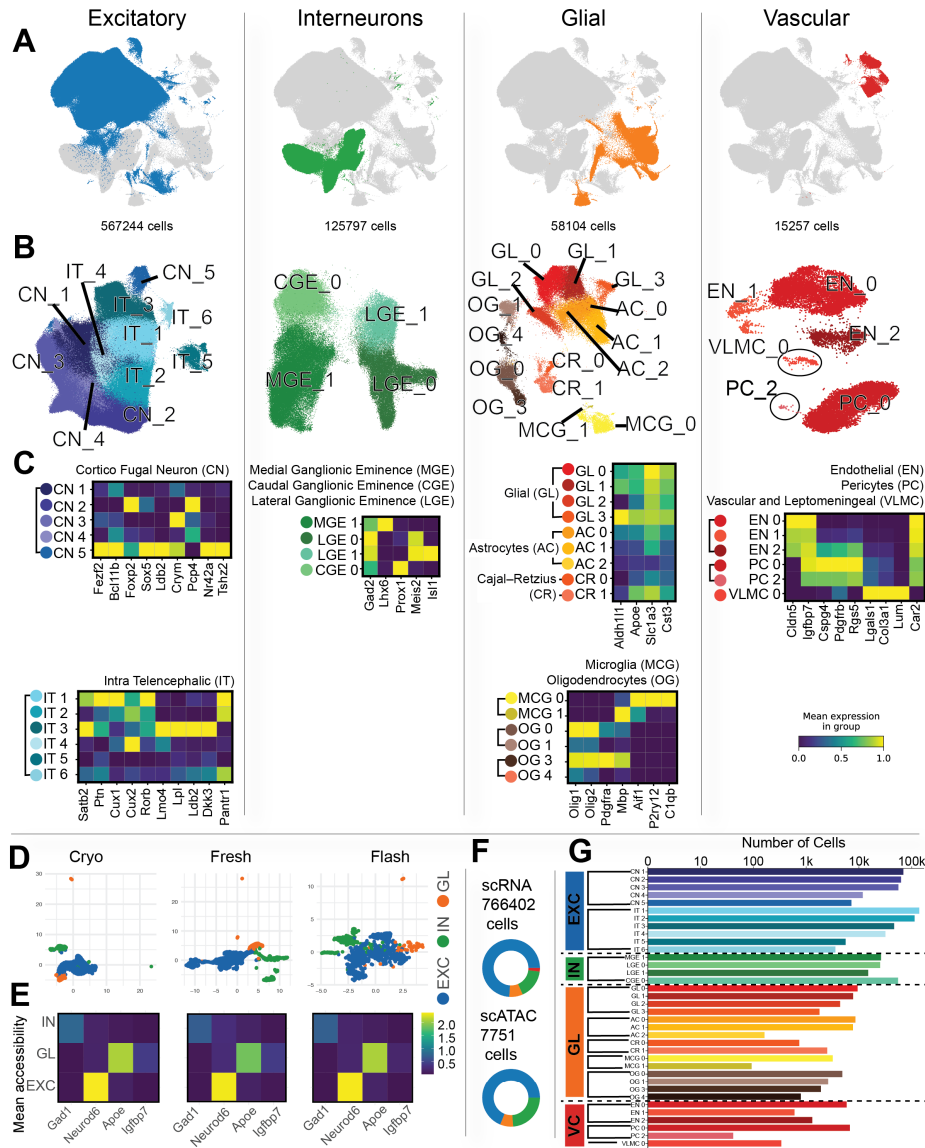

Figure 5: Processing Large Single-Cell Mouse Brain Data for Network Inference (**A**) UMAP plot of all mouse brain scRNA-seq data with Excitatory neurons, Interneurons, Glial cells and Vascular cells colored. (**B**) UMAP plot of cells from each broad category colored by Louvain clusters and labeled by cell type. (**C**) Heatmap of normalized gene expression for marker genes that distinguish cluster cell types within broad categories. (**D**) UMAP plot of mouse brain scATAC data with Excitatory neurons, Interneurons, and Glial cells colored. (**E**) Heatmap of normalized mean gene accessibility for marker genes that distinguish broad categories of cells. (**F**) The number of scRNA-seq and scATAC cells in each of the broad categories. (**G**) The number of scRNA-seq cells in each cell type specific cluster.



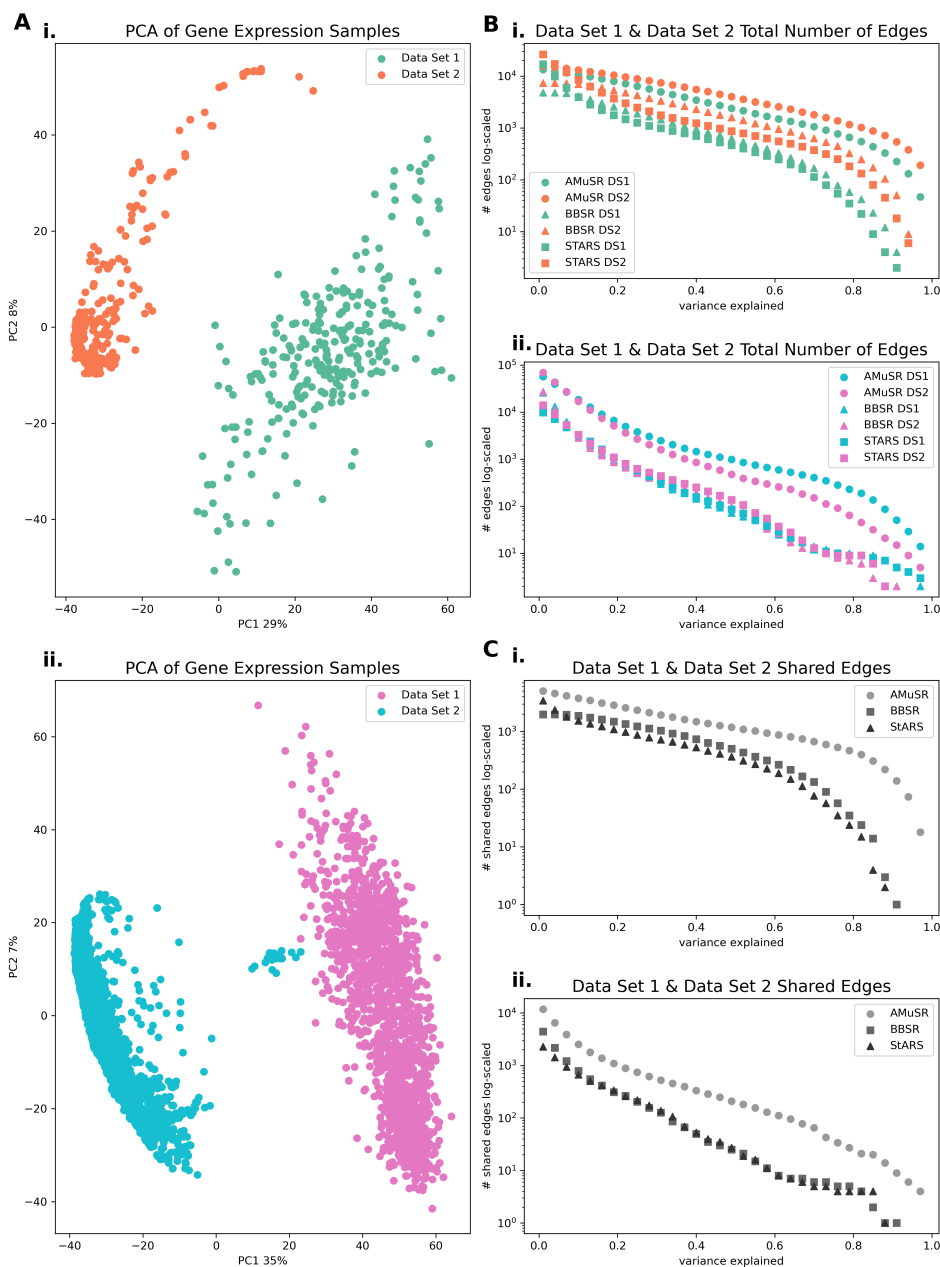

Supplemental Figure 1: Learning *Bacillus subtilis* and *Saccharomyces cerevisiae* networks by tasks. (A) PCA depicts batch effects between datasets for both (i) *Bacillus subtilis* and (ii) *Saccharomyces cerevisiae*. Learning networks by treating the independently collected datasets as separate tasks allows for sharing regulatory commonalities while respecting experimental variance. (B) The number of shared edges between the two datasets, for both model organisms (i) and (ii), shows a high number of overlapping edges. Edges are ranked by their corresponding variance explained for each of the three different model selection approaches: AMuSR, BBSR, and StARS-LASSO. (C) Across the three different model selection approaches, AMuSR learns the highest number of overlapping edges between the respective datasets for model organisms (i) and (ii).



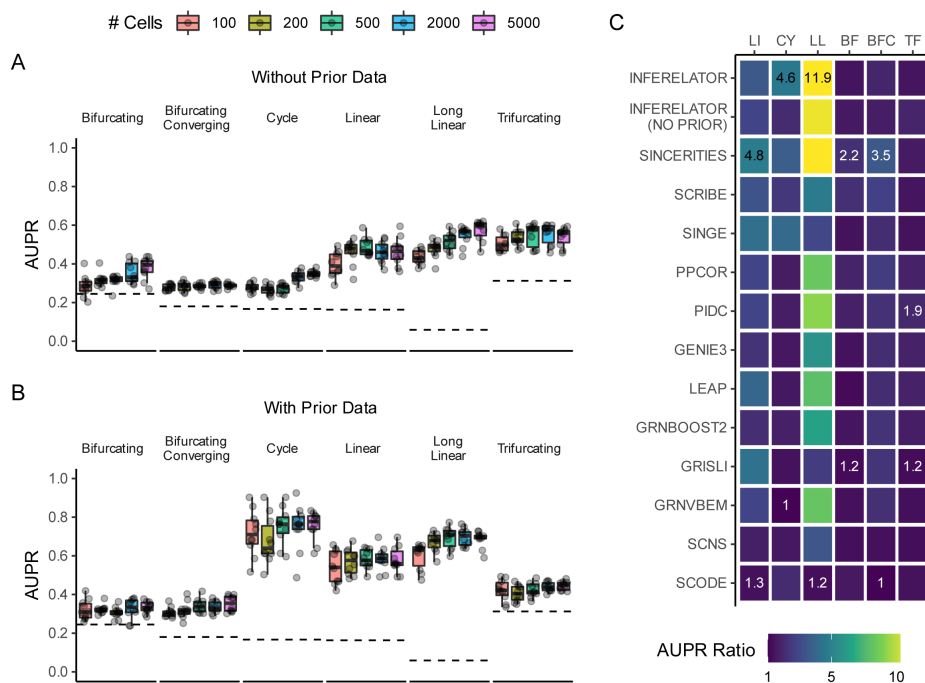

Supplemental Figure 3: Inferelator performance on BEELINE simulated network data. **(A)** Network inference performance of the Inferelator with BBSR model selection as measured by AUPR against the ground truth with no prior network information provided. Dashed lines are the expected baseline of a random predictor. **(B)** Network inference performance of the Inferelator with BBSR model selection as measured by AUPR against half of the ground truth with the other half of the ground truth provided as prior network information. Each point is the median performance of 10 differently-seeded splits. **(C)** Comparison of the AUPR ratio over the baseline for the Inferelator to each of the network inference methods used in the original BEELINE benchmark.

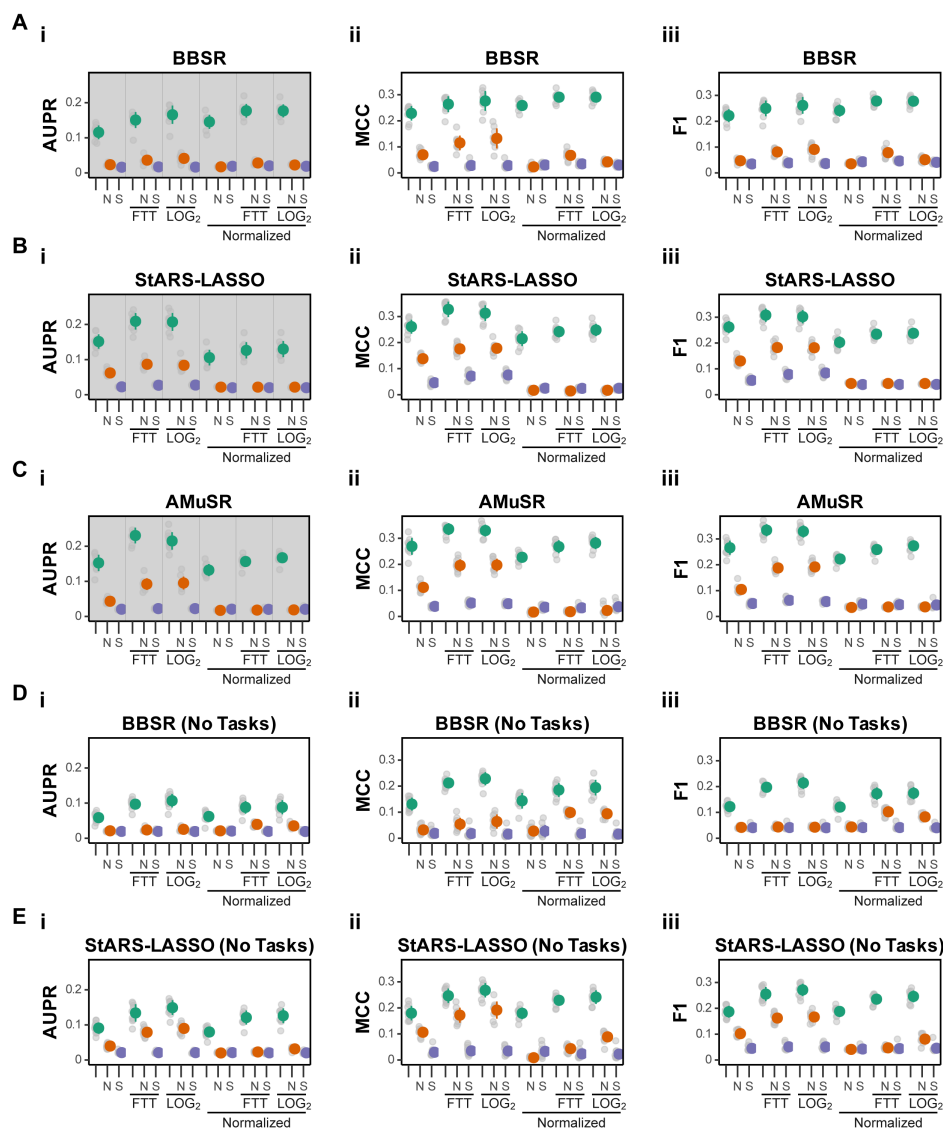

Supplemental Figure 4: Extended single-cell yeast network performance metrics as measured by (i) AUPR, (ii) Matthews Correlation Coefficient (MCC), and (iii) F1 score. Each gray dot represents performance of one network inference run. Colored dots represent the mean and standard deviation. (A) Single-cell yeast network inference performance with a gray background are the same plots as used in main-text Figure 4. (B) Performance of StARS-LASSO model selection. (C) Performance of AMuSR model selection. (D) Performance of BBSR model selection where all cells are used without splitting into multiple tasks. (E) Performance of StARS-LASSO model selection where all cells are used without splitting into multiple tasks.



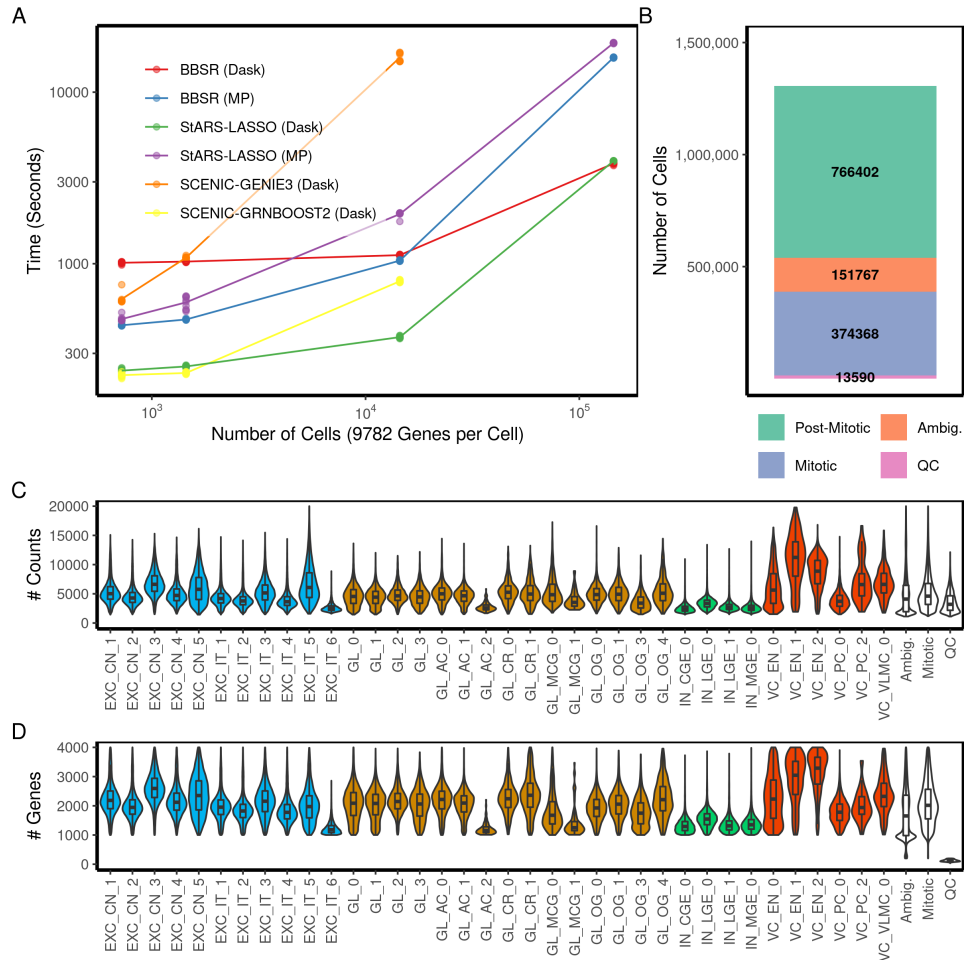

Supplemental Figure 5: **(A)** Computational performance as measured by runtime in seconds using the Dask engine (140 cpu cores) for the Inferelator 3.0 (BBSR or StARS-LASSO), and for SCENIC (GENIE3 or GRNBOOST2). Performance is also measured for the Inferelator 3.0 or using the python-based multiprocessing (MP) engine (28 cpu cores). Expression data is sampled from 144,000 mouse cells and 9,782 genes are modeled for network inference. Runtime is shown for 10 replicate runs for each quantity of cells. **(B)** Number of cells removed during preprocessing for Quality Control (QC), as Mitotic, and as Ambiguous by neuronal marker. Post-mitotic, non-ambiguous cells are retained and clustered. **(C)** Number of single-cell counts per cell in each of 36 cell type-specific groups, and in the groups removed during preprocessing. **(D)** Number of genes per cell in each of 36 cell type-specific groups, and in the groups removed during preprocessing

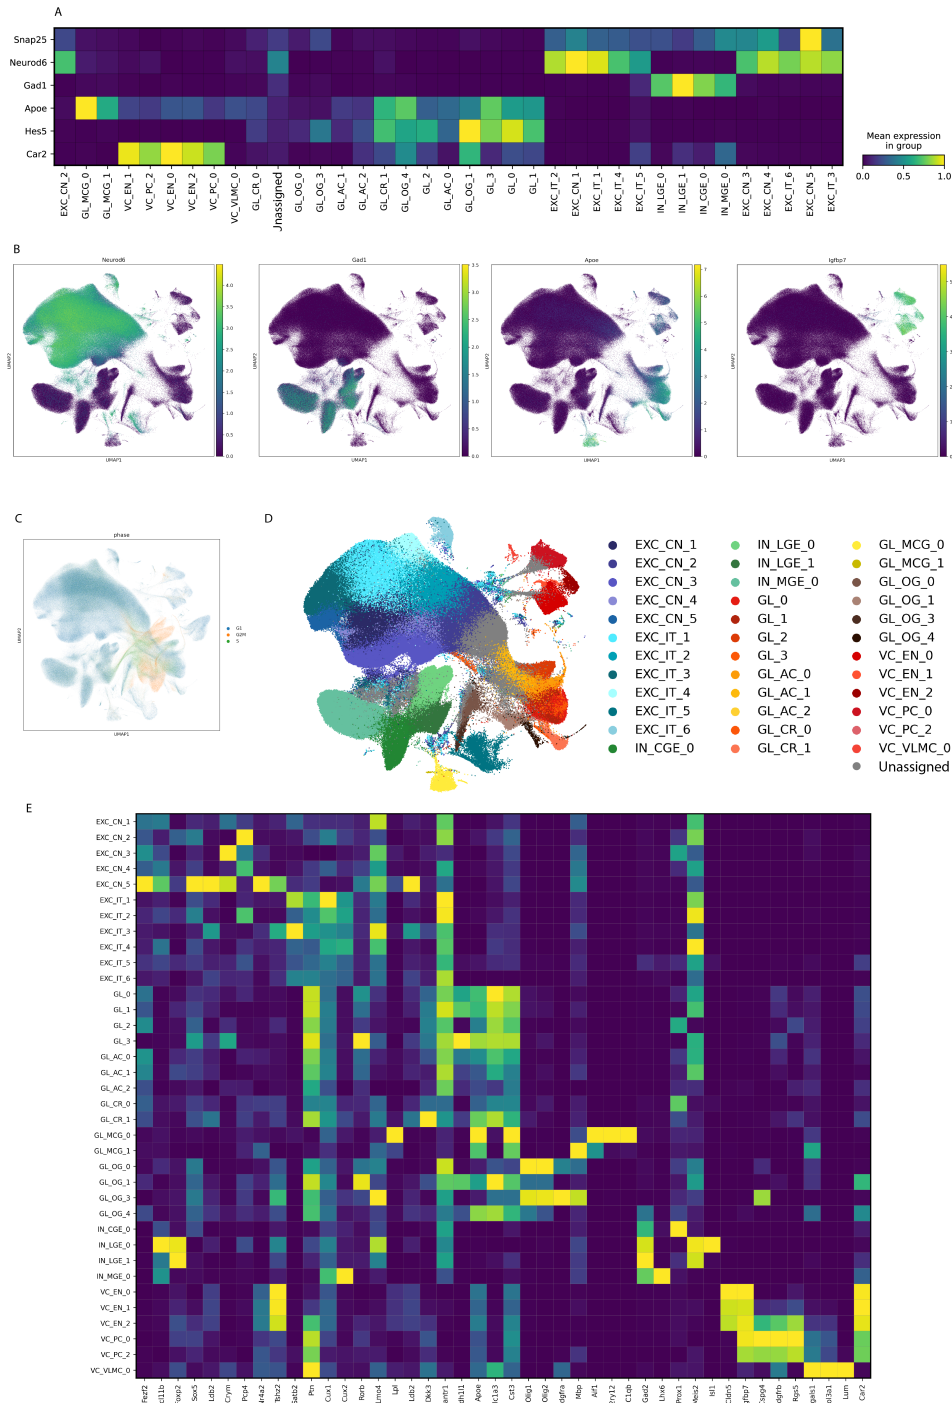

Supplemental Figure 6: **(A)** Cell class marker expression for each annotated subcluster in mouse single-cell brain data. **(B)** UMAP of 766,402 mouse brain cells colored by cell class marker expression. **(C)** UMAP of 1.3M mouse brain cells colored by the assigned cell cycle phase. **(D)** UMAP of 766,402 mouse brain cells colored by 36 assigned subcluster. **(E)** Cell type marker expression by assigned subcluster.

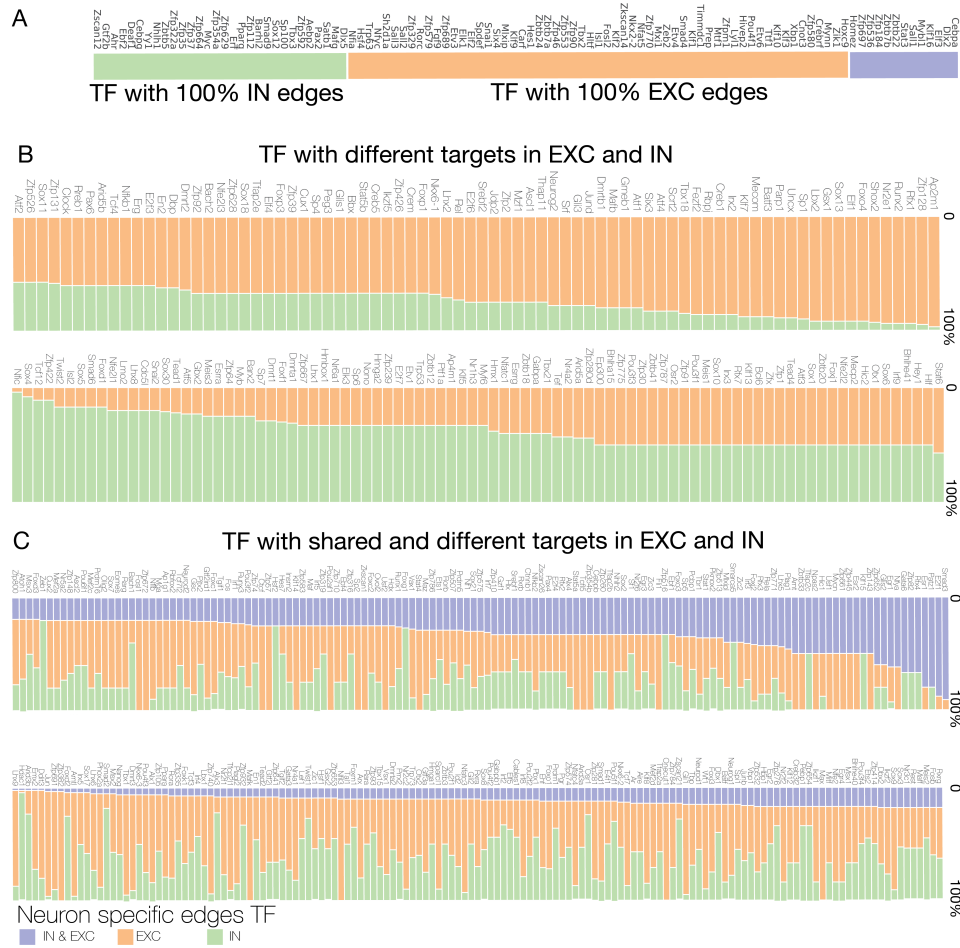

Supplemental Figure 7: **(A)** List of TFs that have identical target genes in GRNs for both Excitatory neurons (EXC) and Interneurons (IN), that have only target genes in Excitatory neurons, and that have only target genes in Interneurons. **(B)** List of TFs that have no shared target genes in GRNs for Excitatory neurons and in GRNs for interneurons. **(C)** TFs that have some shared target genes in GRNs for Excitatory neurons and interneurons, but also have some target genes specific to Excitatory neurons or interneurons.
